1                   **The evolution of extreme fertility defied ancestral gonadotropin mediated**  
2                                           **brain-reproduction tradeoff**

3  
4   Hagai Y Shpigler<sup>1,2</sup>, Brian Herb<sup>2</sup>, Jenny Drnevich<sup>3</sup>, Mark Band<sup>4,5</sup> Gene E Robinson<sup>2,6,7</sup> and Guy Bloch<sup>1</sup>

- 5  
6   1. Department of Ecology, Evolution and Behavior, The Alexander Silberman Institute of Life  
7       Sciences, The Hebrew University of Jerusalem, Jerusalem, Israel  
8   2. Carl R. Woese Institute for Genomic Biology, University of Illinois Urbana-Champaign, Urbana,  
9       Illinois, USA  
10  3. High-Performance Biological Computing Group, Roy J Carver Biotechnology Center, The  
11       University of Illinois at Urbana-Champaign, USA  
12  4. Roy J Carver Biotechnology Center, The University of Illinois at Urbana-Champaign, USA.  
13  5. Institute of Evolution, University of Haifa, Israel.  
14  6. Entomology Department, The University of Illinois at Urbana-Champaign, USA  
15  7. Neuroscience Program, The University of Illinois at Urbana-Champaign, USA

16 **Abstract**

17 Gonadotropic hormones coordinate processes in diverse tissues regulating animal reproductive  
18 physiology and behavior. Juvenile hormone (JH) is the ancient and most common gonadotropin in  
19 insects, but not in advanced eusocial honey bees and ants. To probe the evolutionary basis of this change,  
20 we combined endocrine manipulations, transcriptomics, and behavioral analyses to study JH regulated  
21 processes in a bumble bee showing an intermediate level of sociality. We found that in the fat body,  
22 more JH-regulated genes were upregulated and enriched for metabolic and biosynthetic pathways. This  
23 transcriptomic pattern is consistent with earlier evidence that JH is the major gonadotropin in the bumble  
24 bee. In the brain, most JH-regulated genes were downregulated and enriched for protein turnover  
25 pathways. Brain ribosomal protein gene expression was similarly downregulated in dominant workers,  
26 which naturally have high JH titers. In other species, similar downregulation of protein turnover is found  
27 in aging brains or under stress, and is associated with compromised long-term memory and health. These  
28 findings suggest a previously unknown gonadotropin-mediated tradeoff. We did not find a similar  
29 downregulation of protein turnover pathways in the brain of honey bees in which JH is not a gonadotropin  
30 but rather regulates division of labor. These differences between JH effects in the bumble bee and in the  
31 advanced eusocial honey bee suggest that the evolution of advanced eusociality was associated with  
32 modifications in hormonal signaling supporting extended and extremely high fertility while reducing the  
33 ancient costs of high gonadotropin titers to the brain.

34

35 **Keywords**

36 Social evolution, Bees, Functional genomics, Gonadotropin, Juvenile Hormone.

## 37 **Introduction**

38           Animals tightly regulate reproduction to enhance their fitness. Hormones play key roles in this  
39 process by integrating relevant external and internal information and by coordinating biochemical and  
40 physiological processes across cells and tissues throughout the body (Christensen, et al. 2012). In insects,  
41 juvenile hormone (JH) is the most commonly known gonadotropin regulating vitellogenesis, oogenesis,  
42 and other processes that are associated with reproduction (Wyatt 1997). Given that JH functions as a  
43 gonadotropin in females of the more basal Hemimetabola and most Holometabola insects, it is commonly  
44 accepted that the regulation of reproduction is the ancient and conserved function of JH in adult insects  
45 (De Loof, et al. 2001; Riddiford 2012; Roy, et al. 2018).

46           However, it has long been puzzling that JH does not function as a gonadotropin in all insects  
47 (Cameron and Robinson 1990; West-Eberhard and Turillazzi 1996; Robinson and Vargo 1997). One of  
48 the most remarkable exceptions is in honey bees and several species of ants, in which JH does not  
49 regulate adult female fertility but is rather involved in the regulation of age-related division of labor  
50 among functionally sterile workers (Robinson and Vargo 1997; Hartfelder 2000; Bloch, et al. 2009).  
51 Addressing this question is crucial for understanding both the evolution of advanced eusociality and the  
52 evolution of gonadotropic hormones in general.

53           To study variability in socially-related JH functions, we focused on the best-studied bumble bee,  
54 *Bombus terrestris*. Bumble bees provide an excellent model system with which to address this issue  
55 because they show a simpler form of social organization relative to honey bees and ants (Wilson 1971),  
56 and JH is their major gonadotropic hormone (Röseler 1977; Röseler and Röseler 1978; Bloch, Borst, et al.  
57 2000; Amsalem, et al. 2014; Shpigler, et al. 2014). JH coordinates processes in various tissues that are  
58 involved in *B. terrestris* reproduction including the fat body, ovaries, wax production, and exocrine gland  
59 activity (Shpigler, et al. 2010; Amsalem, et al. 2014; Shpigler, et al. 2014). JH apparently also regulates  
60 processes in the central nervous system because JH manipulations affect behaviors such as dominance  
61 and aggression (Amsalem, et al. 2014; Pandey, et al. 2019). The bumble bee *B. terrestris* thus provides an  
62 excellent contrast to honey bees to address the question of the evolutionary change in JH function  
63 associated with eusociality, but little is known on the molecular processes by which JH coordinates the  
64 various cells and tissues in this species.

65           Here we combine hormonal manipulations, behavioral observations, and RNA sequencing  
66 (RNAseq) of the brain and fat body tissues of *Bombus terrestris* workers. We further take advantage of  
67 two “natural experiments” in which we compared gene expression in bumble bees that naturally differ in  
68 JH titers. First, we analyzed the brain transcriptomes of orphan workers in which the dominant individual

69 in a group typically has high JH titers compared with low-rank groupmates. Second, we compared our  
70 worker fat body transcriptomes to genes differentially expressed between queens and (pre-reproductive)  
71 gynes, which naturally have high and low JH titers, respectively. Our results revealed a previously  
72 unknown gonadotropin-mediated tradeoff in which the activation of reproductive pathways in various  
73 tissues is associated with a significant downregulation of brain pathways involved in protein synthesis  
74 and turnover. This finding suggests that high JH titers are costly to the brain because they reduce protein  
75 biosynthesis that is needed for processes such as long-term memory, synaptic plasticity, and brain  
76 maintenance. Consistent with our premise, we did not find a similar influence of JH on the brain in the  
77 honey bee in which JH is not a gonadotropin, but rather regulates the age-related division of labor among  
78 sterile workers.

## 79 **Results**

### 80 **JH regulates the expression of numerous fat body and brain genes**

81           Manipulating circulating JH levels by surgically removing the JH-producing corpora allata (CA)  
82 modified the expression of thousands of fat body and brain genes (Fig 1A and 2A, for fat body and brain  
83 respectively). In the fat body, 4408 transcripts were differentially expressed between the Allatectomy  
84 (CA-), Sham-operated (S), Control (C) and Replacement Therapy (CA- +JH) treatments (ANOVA, false  
85 discovery rate, FDR < 0.05, 8 bees per treatment). Hierarchical cluster analysis separated the pattern of  
86 gene expression transcriptome of bees with reduced JH titers (CA-) from that of the three other treatments  
87 (Fig. 1A, B). The replacement therapy treated bees differed from the CA- bees, but these two groups were  
88 yet distinct from the Sham and Control treatments. Complementary pairwise comparisons identified 4032,  
89 3274 and 2005 genes that were differentially expressed (FDR < 0.05) between the CA- bees and those  
90 from the Control, Sham and the Replacement Therapy treatments, respectively (Fig 1B, left). A subset of  
91 1512 DEGs differed between the CA- treatment and all three other treatments. This overlap was  
92 significantly higher than expected by chance ( $\chi^2_{(df=7)} = 8316$ ;  $p \ll 0.001$ ). The direction of the change  
93 (i.e., up- or down-regulation) of these shared genes was significantly positively correlated across all  
94 transcripts for the three comparisons (Fig. 1C, Supp Table 1A). Of these, a subset of 873 out of 1512  
95 (57%) DEGs were upregulated and 639 (43%) were downregulated. An additional 1553 DEGs differed  
96 between the CA- bees and only two of the three treatment groups and are also likely to be regulated by JH  
97 (Supp Table 2).

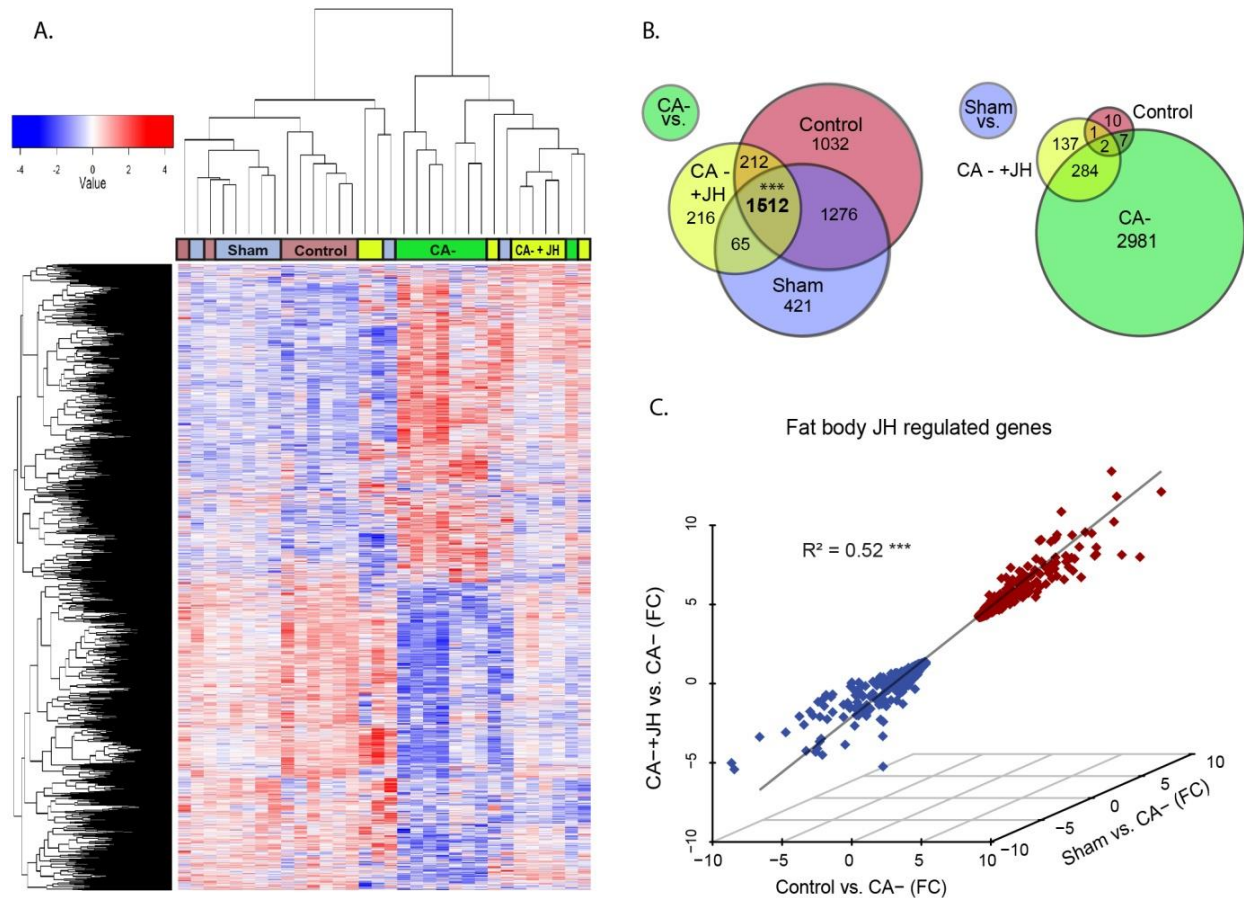

98

99 **Figure 1. The effect of JH on gene expression in the fat body.** Fat body transcriptomic analysis for  
 100 bees subjected to a reduction in JH level (allatectomized, CA-, green), replacement therapy with natural  
 101 JH (CA- + JH, yellow), handling control (*Control*, pink), and sham-operated bees (*Sham*, blue)(n=8  
 102 bees/treatment). **(A)** A heat map of 4032 DEGs (FDR  $p < 0.05$ ) in the fat body. Each row represents one  
 103 gene and each column an individual bee sample. The color scale represents expression level across all  
 104 samples with greater expression represented in red and lesser expression by blue relative to the mean. **(B)**  
 105 Venn diagrams comparing DEGs between the CA- treatment (left), or the Sham treatment (right) and the  
 106 three other treatments. \*\*\* denotes a highly significant ( $p < 0.0001$ ) overlap. **(C)** Three-dimension  
 107 correlation analysis for the direction and fold expression for 1512 transcripts that were differentially  
 108 expressed between the CA- and the three other treatments. Each diamond represents one DEG, red -  
 109 upregulated by JH; blue - downregulated by JH. The  $R^2$  was obtained from a Person correlation test; \*\*\* -  
 110  $< 0.0001$  (See Supp Table 1A for more details).

111 In the brain, JH manipulation affected the expression of 3060 transcripts. As in the fat body,  
112 hierarchical cluster analysis clearly separated the allatecomized (CA-) bees from bees subjected to the  
113 three other treatments (Fig. 2A). Importantly, the replacement therapy treatment was most similar to that  
114 of the sham-treated bees, which means that in also in the brain the operation itself had little or no effect  
115 on gene expression. Complementary pairwise comparisons revealed 2615, 2100 and 1195 transcripts  
116 differentially expressed (FDR  $p < 0.05$ ), between the CA- bees and the Control, Sham, or Replacement  
117 Therapy treated bees, respectively (Fig 2B left). Seven hundred DEGs differed between the CA- bees and  
118 all three other treatments, which is significantly higher overlap than expected by chance ( $\chi^2_{(df=7)} = 7425$ ;  
119  $p \ll 0.001$ , Fig 2B left). These 700 hundred genes provide a conserved estimation of JH regulated genes,  
120 of which 280 (40%) were up- and 420 (60%) down-regulated by JH. This pattern is significantly different  
121 from the fat body in which most genes are upregulated by JH (Z-test for proportions,  $Z = 7.44$ ;  $p = 1.66E-$   
122  $13$ ). The direction of expression of the shared genes was significantly positively correlated and consistent  
123 across all transcripts for the three comparisons (Fig. 2C, Supp table 1B). An additional 1096 DEGs  
124 differed between the CA- bees and only two of the three treatment groups and are also likely to be  
125 regulated by JH (Supp Table 3). The strong effect of JH removal and the reverted pattern in bees  
126 subjected to replacement therapy show that JH regulates the expression of many genes in both the brain  
127 and the fat body of bumble bee workers.

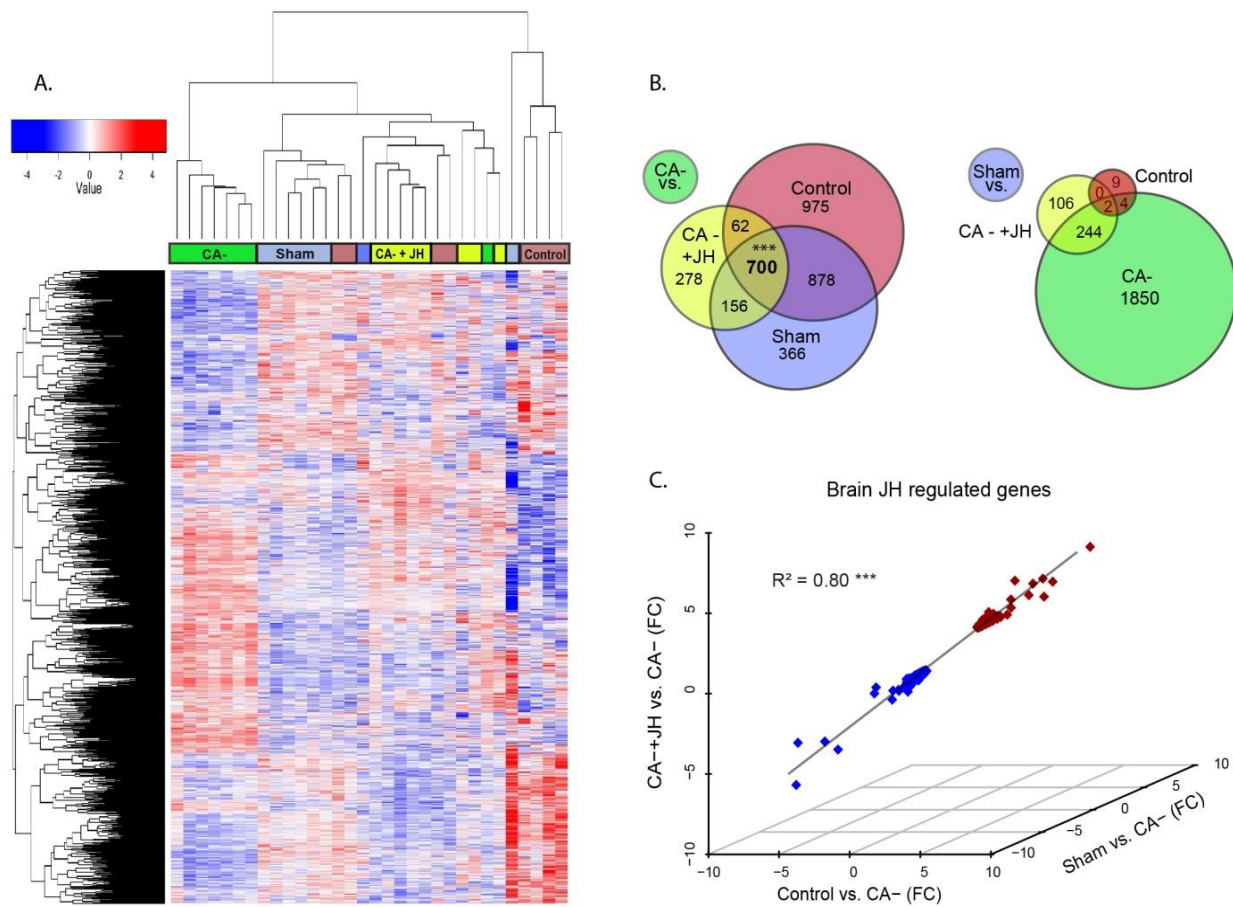

128

129

130 **Figure 2. The effect of JH on brain gene expression.** Details as in Fig 1 (A) Heat map of 3060 DEGs  
 131 (FDR  $p < 0.05$ ) in the brain. (B) Venn diagrams comparing DEGs between the CA- treatment (left) or the  
 132 Sham treatment (right) and the three other treatments. (C) Three-dimensional correlation analysis for the  
 133 fold change expression of 700 overlapping DEGs between the CA- and the three other groups. The  $R^2$  was  
 134 obtained from a Person correlation test; \*\*\* -  $p < 0.0001$  (See Supp. Table 1B for more details).

135



136           Only 20 and 15 differentially expressed genes (DEGs) in the fat body and brain, respectively,  
137 were found to differ between the control and the sham treatments (Fig 1B right and 2B right) indicating  
138 that after five days of recovery the sham operation by itself had only little effect on the patterns of gene  
139 expression in these tissues. These findings indicate that the JH replacement treatment, at least partially,  
140 recovered the effects of CA removal on the pattern of gene expression in the fat body and this effect  
141 cannot be explained by surgery effects.

142           We next performed Weighted Gene Correlation Co-expression Network Analysis (WGCNA)  
143 analyses to identify groups of genes showing a similar co-expression pattern ("modules") irrespective of  
144 whether each gene showed a statistically significant (after FDR correction) difference in expression level.  
145 Using this approach, we identified brain and fat body modules that are up- or down-regulated by JH and  
146 were differently expressed between bees of the CA- bees and the three other treatments (ANOVA  $p <$   
147  $0.05$ ). In the fat body, 10 distinct modules were differently expressed. Modules M3 (886 genes), M8 (249  
148 genes), M9 (244 genes) and M26 (71 genes) were downregulated by JH; modules M2 (1310 genes), M6  
149 (268 genes), M7 (267 genes), M14 (145 genes), M15 (129 genes) and M22 (85 genes) were upregulated  
150 by JH (Supp Fig. 1, Supp Table 4a). Four brain modules were also affected by JH: Modules M2  
151 (347genes) and M6 (264 genes) were downregulated by JH, and M9 (196 genes) and M18 (70 genes)  
152 were upregulated (Supp Fig 2, Supp Table 4b).

### 153 *Tissue specificity of the JH effect on gene expression*

154           We identified only 156 genes that were affected by JH treatment in both tissues (out of the 1512  
155 and 700 genes differentially expressed between the CA- and all other three treatments in the fat body and  
156 brain, respectively). Although this number is 1.37 fold higher than expected by chance (Hypergeometric  
157 test  $p = 1.07E-5$ , Supp. Table 5) it represents only 11% and 23% of the JH-regulated genes in the fat  
158 body and brain, respectively. Most of these genes (139 genes or 89%) were regulated in the same  
159 direction producing a significant correlation between the two tissues (Pearson's correlation:  $R^2 = 0.73$ ,  
160  $t_{(df=154)} = 20.6$ ,  $p \ll 0.001$ ). Gene ontology (GO) analyses revealed that the genes upregulated by JH in  
161 both tissues are enriched for the GO term "mitochondrion" (fold enrichment (FE) = 3.7,  $p = 0.033$ , after  
162 FDR correction), and "Citrate cycle" (FE = 13.6,  $p = 0.058$ ) pathways. No enrichment of any pathway  
163 was found for DEGs that are downregulated by JH in both tissues. Seventeen genes (11%) were affected  
164 by JH in the opposite direction (e.g., up in the fat body and down in the brain). This analysis shows that  
165 although a few processes are similarly regulated in the two tissues, the effect of JH is mostly tissue  
166 specific.

167 *Pathways regulated by JH in the fat body and the brain*

168           Using KEGG-pathways and GO enrichment analyses (based on DEGs between CA- and CA+JH  
169 treatments that represent the direct effect of JH) we found that JH regulates some of the most important  
170 metabolic processes (Table 1; Supp Tables 6a (fat body) and 6b (brain)). Glycolysis, the main pathway  
171 for glucose metabolism, was upregulated in both tissues (Fat body: 12/29 genes, FE: 2.5,  $p = 0.048$ , Fig  
172 3A right; Brain: 7/29 gene, FE: 4.9,  $p = 0.046$ , Fig. 3A left). In the fat body, JH further upregulated the  
173 expression of the citrate acid cycle (18/24 genes, FE = 4.5,  $p = 9.8E-8$ , Fig. 3A right), Oxidative  
174 phosphorylation (OXPHOS, 39/55 genes, FE = 4.26,  $p = 9.9E-17$ , Fig. 3B right), biosynthesis of amino  
175 acids, and fatty acid biosynthetic process (11/24 genes, FE = 3.4,  $p = 0.02$ ). The citrate acid cycle pathway  
176 was not significantly upregulated in the brain when comparing CA- vs CA- +JH, but the difference was  
177 statistically significant when we compared the Sham and CA- treated bees (10/24 genes, FE = 3.44,  $p =$   
178 0.03, Supp. Table 6b) suggesting a possible regulation by JH also in the brain. The OXPHOS pathway  
179 was not rescued by JH replacement therapy in the brain (7/55 genes upregulated in CA+JH relative to the  
180 CA- bees, Fig. 3B left), but was significantly upregulated in the Sham vs the CA- treatments (24/55  
181 genes, FE = 3.6,  $p = 1.2E-6$ ). Several catabolic pathways were regulated only in the brain, including  
182 downregulation of fatty acid metabolic process (17/60 genes; FE:3.4;  $p = 0.003$ ).

183

184

Downregulated by JH FDR<0.05 Raw p<0.05 Upregulated by JH FDR<0.05 Raw p<0.05 Not sig

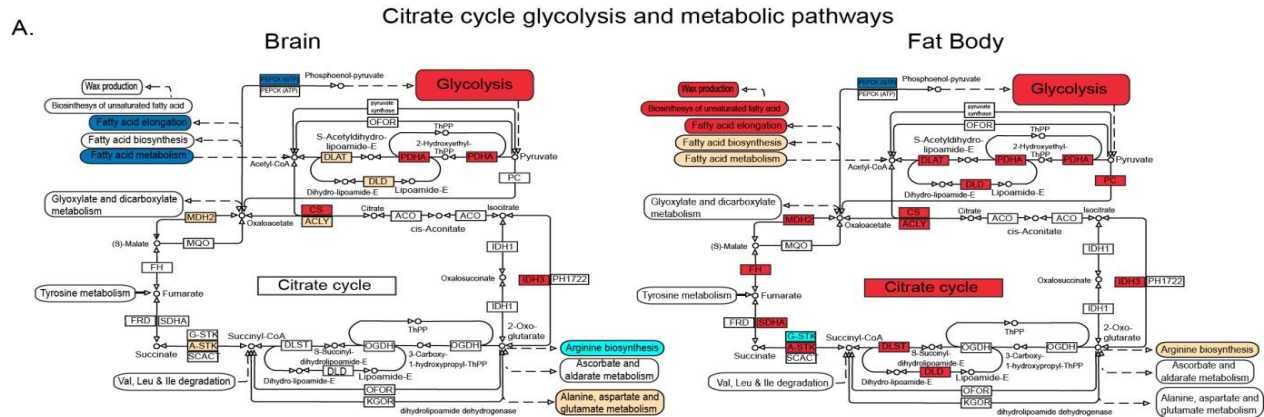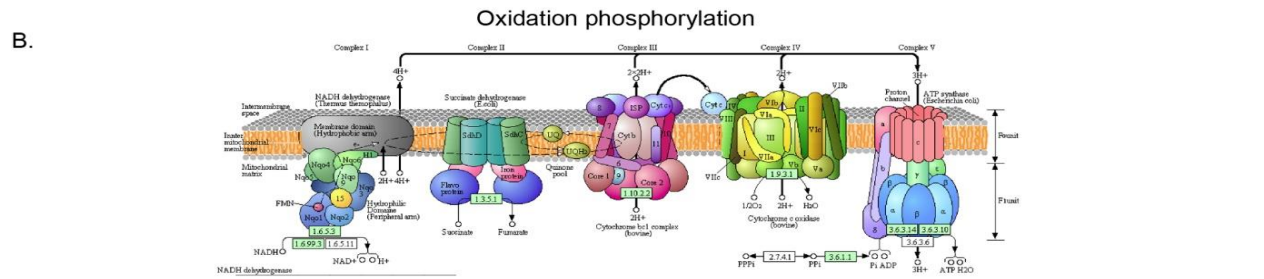

**Brain**

**NADH dehydrogenase**

|                                                        |                                                        |                                                        |                                                        |                                                        |                                                        |                                                        |                                                        |                                                         |                                                         |                                                         |                                                         |                                                         |
|--------------------------------------------------------|--------------------------------------------------------|--------------------------------------------------------|--------------------------------------------------------|--------------------------------------------------------|--------------------------------------------------------|--------------------------------------------------------|--------------------------------------------------------|---------------------------------------------------------|---------------------------------------------------------|---------------------------------------------------------|---------------------------------------------------------|---------------------------------------------------------|
| <span style="background-color: #e6f2ff;">Ndufs1</span> | <span style="background-color: #e6f2ff;">Ndufs2</span> | <span style="background-color: #e6f2ff;">Ndufs3</span> | <span style="background-color: #e6f2ff;">Ndufs4</span> | <span style="background-color: #e6f2ff;">Ndufs5</span> | <span style="background-color: #e6f2ff;">Ndufs6</span> | <span style="background-color: #e6f2ff;">Ndufs7</span> | <span style="background-color: #e6f2ff;">Ndufs8</span> | <span style="background-color: #e6f2ff;">Ndufsv1</span> | <span style="background-color: #e6f2ff;">Ndufsv2</span> | <span style="background-color: #e6f2ff;">Ndufsv3</span> |                                                         |                                                         |
| <span style="background-color: #e6f2ff;">Ndufa1</span> | <span style="background-color: #e6f2ff;">Ndufa2</span> | <span style="background-color: #e6f2ff;">Ndufa3</span> | <span style="background-color: #e6f2ff;">Ndufa4</span> | <span style="background-color: #e6f2ff;">Ndufa5</span> | <span style="background-color: #e6f2ff;">Ndufa6</span> | <span style="background-color: #e6f2ff;">Ndufa7</span> | <span style="background-color: #e6f2ff;">Ndufa8</span> | <span style="background-color: #e6f2ff;">Ndufa9</span>  | <span style="background-color: #e6f2ff;">Ndufa10</span> | <span style="background-color: #e6f2ff;">Ndufa11</span> | <span style="background-color: #e6f2ff;">Ndufa12</span> | <span style="background-color: #e6f2ff;">Ndufa13</span> |
| <span style="background-color: #e6f2ff;">Ndufb1</span> | <span style="background-color: #e6f2ff;">Ndufb2</span> | <span style="background-color: #e6f2ff;">Ndufb3</span> | <span style="background-color: #e6f2ff;">Ndufb4</span> | <span style="background-color: #e6f2ff;">Ndufb5</span> | <span style="background-color: #e6f2ff;">Ndufb6</span> | <span style="background-color: #e6f2ff;">Ndufb7</span> | <span style="background-color: #e6f2ff;">Ndufb8</span> | <span style="background-color: #e6f2ff;">Ndufb9</span>  | <span style="background-color: #e6f2ff;">Ndufb10</span> | <span style="background-color: #e6f2ff;">Ndufb11</span> | <span style="background-color: #e6f2ff;">Ndufb12</span> | <span style="background-color: #e6f2ff;">Ndufb13</span> |

**Succinate dehydrogenase Cytochrom c reductase**

|                                                      |                                                      |                                                      |                                                      |                                                     |                                                       |                                                        |                                                      |                                                      |                                                      |                                                      |                                                      |                                                      |                                                       |
|------------------------------------------------------|------------------------------------------------------|------------------------------------------------------|------------------------------------------------------|-----------------------------------------------------|-------------------------------------------------------|--------------------------------------------------------|------------------------------------------------------|------------------------------------------------------|------------------------------------------------------|------------------------------------------------------|------------------------------------------------------|------------------------------------------------------|-------------------------------------------------------|
| <span style="background-color: #e6f2ff;">SDHC</span> | <span style="background-color: #e6f2ff;">SDHD</span> | <span style="background-color: #e6f2ff;">SDHA</span> | <span style="background-color: #e6f2ff;">SDHB</span> | <span style="background-color: #e6f2ff;">ISP</span> | <span style="background-color: #e6f2ff;">Cyt b</span> | <span style="background-color: #e6f2ff;">Cyt c1</span> | <span style="background-color: #e6f2ff;">COR1</span> | <span style="background-color: #e6f2ff;">QCR2</span> | <span style="background-color: #e6f2ff;">QCR6</span> | <span style="background-color: #e6f2ff;">QCR7</span> | <span style="background-color: #e6f2ff;">QCR8</span> | <span style="background-color: #e6f2ff;">QCR9</span> | <span style="background-color: #e6f2ff;">QCR10</span> |
|------------------------------------------------------|------------------------------------------------------|------------------------------------------------------|------------------------------------------------------|-----------------------------------------------------|-------------------------------------------------------|--------------------------------------------------------|------------------------------------------------------|------------------------------------------------------|------------------------------------------------------|------------------------------------------------------|------------------------------------------------------|------------------------------------------------------|-------------------------------------------------------|

**Cytochrom c oxidase**

|                                                       |                                                      |                                                       |                                                       |                                                       |                                                       |                                                       |                                                       |                                                       |                                                       |                                                      |                                                       |                                                       |                                                       |
|-------------------------------------------------------|------------------------------------------------------|-------------------------------------------------------|-------------------------------------------------------|-------------------------------------------------------|-------------------------------------------------------|-------------------------------------------------------|-------------------------------------------------------|-------------------------------------------------------|-------------------------------------------------------|------------------------------------------------------|-------------------------------------------------------|-------------------------------------------------------|-------------------------------------------------------|
| <span style="background-color: #e6f2ff;">COX10</span> | <span style="background-color: #e6f2ff;">COX4</span> | <span style="background-color: #e6f2ff;">COX5A</span> | <span style="background-color: #e6f2ff;">COX5B</span> | <span style="background-color: #e6f2ff;">COX6A</span> | <span style="background-color: #e6f2ff;">COX6B</span> | <span style="background-color: #e6f2ff;">COX6C</span> | <span style="background-color: #e6f2ff;">COX7A</span> | <span style="background-color: #e6f2ff;">COX7B</span> | <span style="background-color: #e6f2ff;">COX7C</span> | <span style="background-color: #e6f2ff;">COX8</span> | <span style="background-color: #e6f2ff;">COX11</span> | <span style="background-color: #e6f2ff;">COX15</span> | <span style="background-color: #e6f2ff;">COX17</span> |
|-------------------------------------------------------|------------------------------------------------------|-------------------------------------------------------|-------------------------------------------------------|-------------------------------------------------------|-------------------------------------------------------|-------------------------------------------------------|-------------------------------------------------------|-------------------------------------------------------|-------------------------------------------------------|------------------------------------------------------|-------------------------------------------------------|-------------------------------------------------------|-------------------------------------------------------|

**F-type ATPase**

|                                                       |                                                      |                                                       |                                                       |                                                         |                                                   |
|-------------------------------------------------------|------------------------------------------------------|-------------------------------------------------------|-------------------------------------------------------|---------------------------------------------------------|---------------------------------------------------|
| <span style="background-color: #e6f2ff;">alpha</span> | <span style="background-color: #e6f2ff;">beta</span> | <span style="background-color: #e6f2ff;">gamma</span> | <span style="background-color: #e6f2ff;">delta</span> | <span style="background-color: #e6f2ff;">epsilon</span> |                                                   |
| <span style="background-color: #e6f2ff;">OSCP</span>  | <span style="background-color: #e6f2ff;">a</span>    | <span style="background-color: #e6f2ff;">b</span>     | <span style="background-color: #e6f2ff;">c</span>     | <span style="background-color: #e6f2ff;">d</span>       | <span style="background-color: #e6f2ff;">e</span> |
| <span style="background-color: #e6f2ff;">f</span>     | <span style="background-color: #e6f2ff;">g</span>    | <span style="background-color: #e6f2ff;">f6/h</span>  | <span style="background-color: #e6f2ff;">j</span>     | <span style="background-color: #e6f2ff;">k</span>       | <span style="background-color: #e6f2ff;">8</span> |

**V-type ATPase**

|                                                   |                                                   |                                                   |                                                   |                                                    |                                                   |                                                   |                                                   |
|---------------------------------------------------|---------------------------------------------------|---------------------------------------------------|---------------------------------------------------|----------------------------------------------------|---------------------------------------------------|---------------------------------------------------|---------------------------------------------------|
| <span style="background-color: #e6f2ff;">A</span> | <span style="background-color: #e6f2ff;">B</span> | <span style="background-color: #e6f2ff;">C</span> | <span style="background-color: #e6f2ff;">D</span> | <span style="background-color: #e6f2ff;">E</span>  | <span style="background-color: #e6f2ff;">F</span> | <span style="background-color: #e6f2ff;">G</span> | <span style="background-color: #e6f2ff;">H</span> |
| <span style="background-color: #e6f2ff;">a</span> | <span style="background-color: #e6f2ff;">c</span> | <span style="background-color: #e6f2ff;">d</span> | <span style="background-color: #e6f2ff;">e</span> | <span style="background-color: #e6f2ff;">S1</span> |                                                   |                                                   |                                                   |

**Fat Body**

**NADH dehydrogenase**

|                                                        |                                                        |                                                        |                                                        |                                                        |                                                        |                                                        |                                                        |                                                         |                                                         |                                                         |                                                         |                                                         |
|--------------------------------------------------------|--------------------------------------------------------|--------------------------------------------------------|--------------------------------------------------------|--------------------------------------------------------|--------------------------------------------------------|--------------------------------------------------------|--------------------------------------------------------|---------------------------------------------------------|---------------------------------------------------------|---------------------------------------------------------|---------------------------------------------------------|---------------------------------------------------------|
| <span style="background-color: #e6f2ff;">Ndufs1</span> | <span style="background-color: #e6f2ff;">Ndufs2</span> | <span style="background-color: #e6f2ff;">Ndufs3</span> | <span style="background-color: #e6f2ff;">Ndufs4</span> | <span style="background-color: #e6f2ff;">Ndufs5</span> | <span style="background-color: #e6f2ff;">Ndufs6</span> | <span style="background-color: #e6f2ff;">Ndufs7</span> | <span style="background-color: #e6f2ff;">Ndufs8</span> | <span style="background-color: #e6f2ff;">Ndufsv1</span> | <span style="background-color: #e6f2ff;">Ndufsv2</span> | <span style="background-color: #e6f2ff;">Ndufsv3</span> |                                                         |                                                         |
| <span style="background-color: #e6f2ff;">Ndufa1</span> | <span style="background-color: #e6f2ff;">Ndufa2</span> | <span style="background-color: #e6f2ff;">Ndufa3</span> | <span style="background-color: #e6f2ff;">Ndufa4</span> | <span style="background-color: #e6f2ff;">Ndufa5</span> | <span style="background-color: #e6f2ff;">Ndufa6</span> | <span style="background-color: #e6f2ff;">Ndufa7</span> | <span style="background-color: #e6f2ff;">Ndufa8</span> | <span style="background-color: #e6f2ff;">Ndufa9</span>  | <span style="background-color: #e6f2ff;">Ndufa10</span> | <span style="background-color: #e6f2ff;">Ndufa11</span> | <span style="background-color: #e6f2ff;">Ndufa12</span> | <span style="background-color: #e6f2ff;">Ndufa13</span> |
| <span style="background-color: #e6f2ff;">Ndufb1</span> | <span style="background-color: #e6f2ff;">Ndufb2</span> | <span style="background-color: #e6f2ff;">Ndufb3</span> | <span style="background-color: #e6f2ff;">Ndufb4</span> | <span style="background-color: #e6f2ff;">Ndufb5</span> | <span style="background-color: #e6f2ff;">Ndufb6</span> | <span style="background-color: #e6f2ff;">Ndufb7</span> | <span style="background-color: #e6f2ff;">Ndufb8</span> | <span style="background-color: #e6f2ff;">Ndufb9</span>  | <span style="background-color: #e6f2ff;">Ndufb10</span> | <span style="background-color: #e6f2ff;">Ndufb11</span> | <span style="background-color: #e6f2ff;">Ndufb12</span> | <span style="background-color: #e6f2ff;">Ndufb13</span> |

**Succinate dehydrogenase Cytochrom c reductase**

|                                                      |                                                      |                                                      |                                                      |                                                     |                                                       |                                                        |                                                      |                                                      |                                                      |                                                      |                                                      |                                                      |                                                       |
|------------------------------------------------------|------------------------------------------------------|------------------------------------------------------|------------------------------------------------------|-----------------------------------------------------|-------------------------------------------------------|--------------------------------------------------------|------------------------------------------------------|------------------------------------------------------|------------------------------------------------------|------------------------------------------------------|------------------------------------------------------|------------------------------------------------------|-------------------------------------------------------|
| <span style="background-color: #e6f2ff;">SDHC</span> | <span style="background-color: #e6f2ff;">SDHD</span> | <span style="background-color: #e6f2ff;">SDHA</span> | <span style="background-color: #e6f2ff;">SDHB</span> | <span style="background-color: #e6f2ff;">ISP</span> | <span style="background-color: #e6f2ff;">Cyt b</span> | <span style="background-color: #e6f2ff;">Cyt c1</span> | <span style="background-color: #e6f2ff;">COR1</span> | <span style="background-color: #e6f2ff;">QCR2</span> | <span style="background-color: #e6f2ff;">QCR6</span> | <span style="background-color: #e6f2ff;">QCR7</span> | <span style="background-color: #e6f2ff;">QCR8</span> | <span style="background-color: #e6f2ff;">QCR9</span> | <span style="background-color: #e6f2ff;">QCR10</span> |
|------------------------------------------------------|------------------------------------------------------|------------------------------------------------------|------------------------------------------------------|-----------------------------------------------------|-------------------------------------------------------|--------------------------------------------------------|------------------------------------------------------|------------------------------------------------------|------------------------------------------------------|------------------------------------------------------|------------------------------------------------------|------------------------------------------------------|-------------------------------------------------------|

**Cytochrom c oxidase**

|                                                       |                                                      |                                                       |                                                       |                                                       |                                                       |                                                       |                                                       |                                                       |                                                       |                                                      |                                                       |                                                       |                                                       |
|-------------------------------------------------------|------------------------------------------------------|-------------------------------------------------------|-------------------------------------------------------|-------------------------------------------------------|-------------------------------------------------------|-------------------------------------------------------|-------------------------------------------------------|-------------------------------------------------------|-------------------------------------------------------|------------------------------------------------------|-------------------------------------------------------|-------------------------------------------------------|-------------------------------------------------------|
| <span style="background-color: #e6f2ff;">COX10</span> | <span style="background-color: #e6f2ff;">COX4</span> | <span style="background-color: #e6f2ff;">COX5A</span> | <span style="background-color: #e6f2ff;">COX5B</span> | <span style="background-color: #e6f2ff;">COX6A</span> | <span style="background-color: #e6f2ff;">COX6B</span> | <span style="background-color: #e6f2ff;">COX6C</span> | <span style="background-color: #e6f2ff;">COX7A</span> | <span style="background-color: #e6f2ff;">COX7B</span> | <span style="background-color: #e6f2ff;">COX7C</span> | <span style="background-color: #e6f2ff;">COX8</span> | <span style="background-color: #e6f2ff;">COX11</span> | <span style="background-color: #e6f2ff;">COX15</span> | <span style="background-color: #e6f2ff;">COX17</span> |
|-------------------------------------------------------|------------------------------------------------------|-------------------------------------------------------|-------------------------------------------------------|-------------------------------------------------------|-------------------------------------------------------|-------------------------------------------------------|-------------------------------------------------------|-------------------------------------------------------|-------------------------------------------------------|------------------------------------------------------|-------------------------------------------------------|-------------------------------------------------------|-------------------------------------------------------|

**F-type ATPase**

|                                                       |                                                      |                                                       |                                                       |                                                         |                                                   |
|-------------------------------------------------------|------------------------------------------------------|-------------------------------------------------------|-------------------------------------------------------|---------------------------------------------------------|---------------------------------------------------|
| <span style="background-color: #e6f2ff;">alpha</span> | <span style="background-color: #e6f2ff;">beta</span> | <span style="background-color: #e6f2ff;">gamma</span> | <span style="background-color: #e6f2ff;">delta</span> | <span style="background-color: #e6f2ff;">epsilon</span> |                                                   |
| <span style="background-color: #e6f2ff;">OSCP</span>  | <span style="background-color: #e6f2ff;">a</span>    | <span style="background-color: #e6f2ff;">b</span>     | <span style="background-color: #e6f2ff;">c</span>     | <span style="background-color: #e6f2ff;">d</span>       | <span style="background-color: #e6f2ff;">e</span> |
| <span style="background-color: #e6f2ff;">f</span>     | <span style="background-color: #e6f2ff;">g</span>    | <span style="background-color: #e6f2ff;">f6/h</span>  | <span style="background-color: #e6f2ff;">j</span>     | <span style="background-color: #e6f2ff;">k</span>       | <span style="background-color: #e6f2ff;">8</span> |

**V-type ATPase**

|                                                   |                                                   |                                                   |                                                   |                                                    |                                                   |                                                   |                                                   |
|---------------------------------------------------|---------------------------------------------------|---------------------------------------------------|---------------------------------------------------|----------------------------------------------------|---------------------------------------------------|---------------------------------------------------|---------------------------------------------------|
| <span style="background-color: #e6f2ff;">A</span> | <span style="background-color: #e6f2ff;">B</span> | <span style="background-color: #e6f2ff;">C</span> | <span style="background-color: #e6f2ff;">D</span> | <span style="background-color: #e6f2ff;">E</span>  | <span style="background-color: #e6f2ff;">F</span> | <span style="background-color: #e6f2ff;">G</span> | <span style="background-color: #e6f2ff;">H</span> |
| <span style="background-color: #e6f2ff;">a</span> | <span style="background-color: #e6f2ff;">c</span> | <span style="background-color: #e6f2ff;">d</span> | <span style="background-color: #e6f2ff;">e</span> | <span style="background-color: #e6f2ff;">S1</span> |                                                   |                                                   |                                                   |

185

186 **Figure 3: The influence of JH on the expression of genes encoding proteins involved in metabolic**  
 187 **pathways.** Each gene is depicted as a box with its common name and relative location in the denoted  
 188 pathways. **(A)** Citrate cycle, glycolysis and related metabolic pathways in the fat body (right) and brain  
 189 (left). **(B)** The oxidation phosphorylation pathway. The top panel shows a schematic representation of the  
 190 pathways. The bottom schemes summarise differential gene expression in the fat body (right panel) and  
 191 the brain (left panel). The effect of JH on gene expression is color-coded: dark blue - downregulation:  
 192 (FDR  $p < 0.05$ ); light blue (raw  $p < 0.05$ , but  $p > 0.05$  after FDR correction). Dark red - upregulation  
 193 (FDR  $p < 0.05$ ); light red (raw  $p < 0.05$ , but  $p > 0.05$  after FDR correction). The illustrations are based on  
 194 the KEGG pathway; citrate cycle: map00020 and OXPHOS: map00190. Full enrichment analysis can be  
 195 found in Table 1 and at Supp Tables 6a and 6b

196           The pathway analyses revealed significant effects on the expression of genes involved in protein  
197 biosynthesis and degradation (Table 1). The expression of ribosomal protein genes was enriched in both  
198 tissues, but the effect was different. In the fat body, we identified an increase in transcript abundance for  
199 mitochondria ribosomal (mitoribosome) proteins (21/49 genes; FE = 3.2;  $p = 2.6E-5$ ; Fig. 4A, right  
200 panel). This finding is consistent with the upregulation in OXPHOS and citrate acid cycle because their  
201 proteins are synthesized in the mitochondrion by the mitoribosome. The endoplasmic reticulum, the  
202 complex responsible for protein folding and packing was also upregulated by JH in the fat body (58/232  
203 genes, FE = 1.9,  $p = 2.0E-5$ ). The pattern was different in the brain: The expression of cytosolic ribosomal  
204 proteins, which were not enriched in the fat body (FE = 0.31;  $p = 0.41$ , Fig. 4A, right panel), showed a  
205 remarkable enrichment in the brain with an almost universal, downregulation (71/84 genes; FE = 9.3;  $p =$   
206  $1.4E-59$ , Fig. 4A, left panel). Genes encoding translational elongation proteins were also downregulated  
207 in the brain (8/15 genes; FE = 6.3;  $p = 0.01$ ). Taken together, these findings suggest that high JH levels  
208 significantly reduce protein production in the brain. On the other hand, there was no significant  
209 enrichment for the mitoribosome in the brain (FE = 0.4;  $p = 0.23$ , Fig 4A left panel). JH also regulated the  
210 expression of genes of the proteasome, a protein-degrading complex that plays a major role in  
211 determining protein abundance in the cell. Similar to the ribosome, the expression of proteasomal proteins  
212 were regulated in an opposite direction in the two tissues: There was a consistent upregulation in the fat  
213 body (20/32 genes; FE = 3.7;  $p = 7.4E-7$ ; Fig. 4B, right panel) and a statistically not significant  
214 enrichment for genes downregulated (after FDR correction) in the brain (6/32 genes, FE = 2.4; FDR  $p =$   
215  $0.28$ , Fig. 4B, left panel). However, it is notable that ten additional brain proteasomal genes were  
216 downregulated by JH, but these differences are not statistically significant after FDR correction (Fig. 4B,  
217 light blue color in the left panel). Notably, none of the proteasome genes showed upregulated expression  
218 in this tissue. Finally, genes encoding proteins of the lysosome, the organelle responsible for biomolecule  
219 (including protein) degradation and organelle recycling, were significantly upregulated in the brain (10/45  
220 genes, FE = 4.5,  $p = 0.007$ ).

Downregulated by JH FDR<0.05 Raw p<0.05 Upregulated by JH FDR<0.05 Raw p<0.05 Not sig

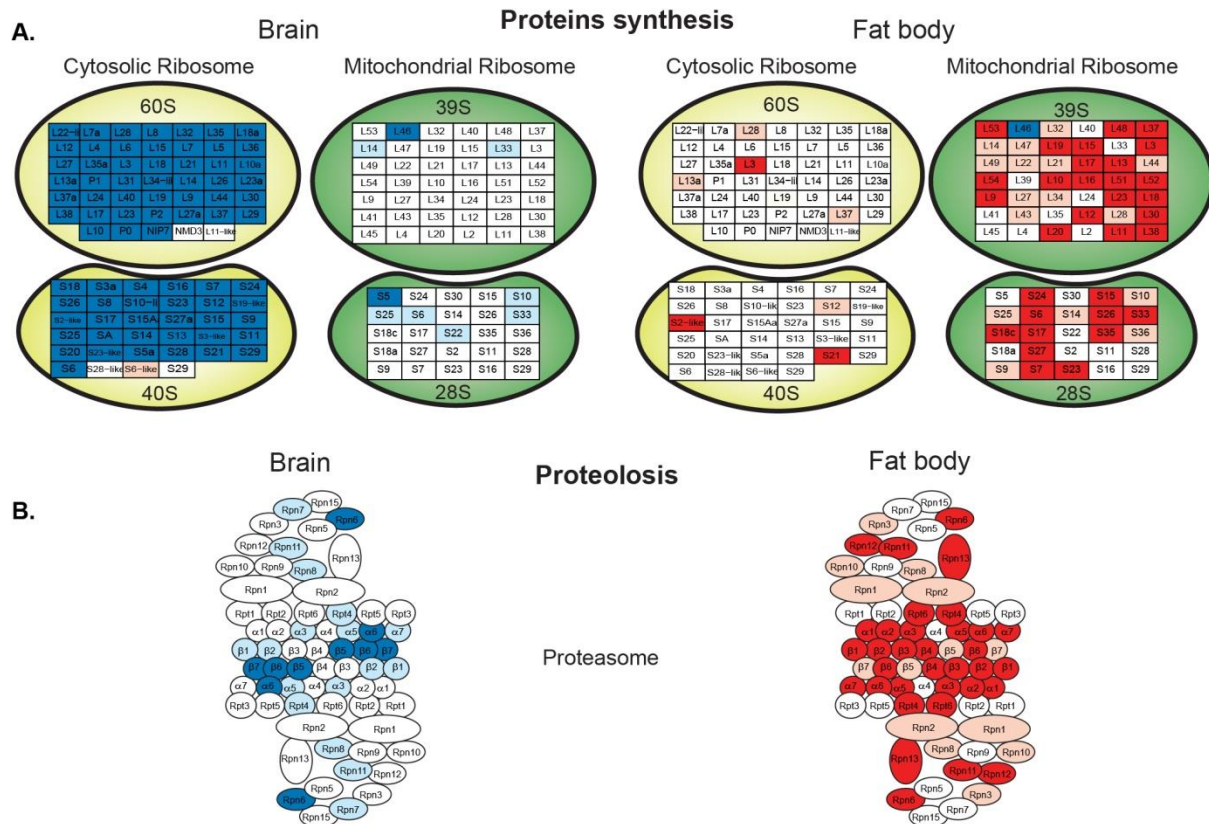

221

222 **Figure 4: The influence of JH on gene pathways involved in protein synthesis and breakdown. (A)**

223 Ribosomal protein genes in the cytosol and mitochondria in the fat body (right) and brain (left). Each

224 ribosomal protein gene is depicted as a box with its common name and is assigned to the corresponding

225 ribosomal unit (depicted as ellipsoid structures). **(B)** Genes encoding proteasomal proteins. Each

226 proteasomal protein is depicted as an ellipsoid with its common name. The effect of JH on gene

227 expression is color-coded as in Fig. 3. The illustrations are based on the KEGG pathway; ribosome: map

228 03010 and proteasome: map 03050 (The proteasome is built of two identical subunits and each protein is

229 drawn twice in the figure).

230

231 The WGCNA analysis, which links more genes to JH regulation, extends and supports these

232 findings. Fat body modules 2, 6, 14 and 15, which are upregulated by JH, were enriched for the metabolic

233 pathways: citrate cycle, oxidative phosphorylation (M2 and M15) and Glycolysis (M14), and for the

234 KEGG pathways proteasome and mitochondrial ribosome (M2 and M6, Table 1; Supp. Table 4a). In the

235 brain module 2 was downregulated by JH and highly enriched for the cytosolic ribosome pathway (Supp.

236 Table 4b). Taken together, these analyses suggest that high JH decreases protein biosynthesis in the brain

237 and increase metabolic pathways in the fat body.

238

239 **Table 1. KEGG / GO enrichment analyses for JH regulated genes in the fat body and brain.**

240 Summary of major pathways and GO terms enriched for genes differentially expressed between the CA-  
 241 +JH and CA- treatments. Orange background - terms upregulated by JH; light blue - terms downregulated  
 242 by JH. #of Genes: The number of DEGs in the pathway/term; Fold enrichment: (#DEGs in the pathway /  
 243 total DEGs) / (#genes in the pathway/background); p-value: Fisher exact test, FDR: false discovery rate  
 244 correction. The p-values are color-coded from high to low (red to white), WGCNA module/s – the  
 245 number of the WGCNA module/s which were enriched for the KEGG pathway / GO term and differently  
 246 expressed between the CA- treatment group and the three other treatments.

|      |                                               | Fat body               |            |                 |         |           |                |
|------|-----------------------------------------------|------------------------|------------|-----------------|---------|-----------|----------------|
|      |                                               | KEGG pathway / GO term | # of Genes | Fold Enrichment | P-value | FDR       | WGCNA module/s |
| Up   | Mitochondrion                                 | 139                    | 2.5        | 1.5E-29         | 7.4E-27 | 2, 15, 22 |                |
|      | Oxidative phosphorylation                     | 39                     | 4.3        | 9.8E-19         | 9.9E-17 | 2, 15     |                |
|      | Metabolic pathways                            | 133                    | 1.6        | 3.1E-11         | 1.5E-09 | 14, 15    |                |
|      | Carbon metabolism                             | 34                     | 3.0        | 3.5E-10         | 1.2E-08 | 14, 15    |                |
|      | Citrate cycle                                 | 18                     | 4.5        | 3.9E-09         | 9.8E-08 | 15        |                |
|      | Proteasome                                    | 20                     | 3.8        | 3.6E-08         | 7.4E-07 | 6         |                |
|      | Lipid particle                                | 42                     | 2.3        | 1.8E-07         | 5.1E-06 | 14, 15    |                |
|      | Endoplasmic reticulum                         | 58                     | 1.9        | 9.6E-07         | 2.0E-05 | 2, 6      |                |
|      | Mitochondrial ribosome                        | 21                     | 3.2        | 1.3E-06         | 2.6E-05 | 2         |                |
|      | Biosynthesis of antibiotics                   | 41                     | 2.0        | 6.7E-06         | 1.1E-04 | 14, 15    |                |
|      | Ubiquitin-dependent protein catabolic process | 47                     | 2.0        | 4.8E-06         | 3.0E-04 | 2, 6      |                |
|      | Fatty acid biosynthetic process               | 11                     | 3.4        | 6.0E-04         | 2.3E-02 | 7         |                |
|      | Glycolysis                                    | 12                     | 2.5        | 4.4E-03         | 4.8E-02 | 14        |                |
|      | Biosynthesis of amino acids                   | 15                     | 2.2        | 4.2E-03         | 5.2E-02 | 14        |                |
| Down | Cell junction                                 | 34                     | 2.2        | 1.2E-05         | 3.0E-03 | 3, 8      |                |
|      | Cell cortex                                   | 28                     | 2.3        | 4.4E-05         | 7.2E-03 | 8         |                |
|      | Cytoplasmic region                            | 29                     | 2.1        | 1.2E-04         | 1.1E-02 | 3         |                |

  

|      |                                                           | Brain                  |            |                 |         |      |                |
|------|-----------------------------------------------------------|------------------------|------------|-----------------|---------|------|----------------|
|      |                                                           | KEGG pathway / GO term | # of Genes | Fold Enrichment | P-value | FDR  | WGCNA module/s |
| Up   | Lysosome                                                  | 10                     | 4.5        | 2.0E-04         | 6.8E-03 | 9    |                |
|      | Glycolysis                                                | 7                      | 4.9        | 2.1E-03         | 4.6E-02 | -    |                |
|      | Plasma membrane proton-transporting V-type ATPase complex | 6                      | 9.9        | 1.9E-04         | 5.5E-02 | -    |                |
|      | Biosynthesis of antibiotics                               | 14                     | 2.3        | 5.3E-03         | 7.0E-02 | 9    |                |
|      | Carbon metabolism                                         | 10                     | 2.9        | 4.5E-03         | 7.4E-02 | -    |                |
| Down | Cytosolic ribosome                                        | 71                     | 9.3        | 3.3E-62         | 1.4E-59 | 2    |                |
|      | Centrosome cycle                                          | 27                     | 4.3        | 6.8E-11         | 1.9E-08 | 2    |                |
|      | Fatty acid metabolic process                              | 17                     | 3.4        | 2.1E-05         | 3.0E-03 | 2, 6 |                |
|      | Translational elongation                                  | 8                      | 6.3        | 9.8E-05         | 1.2E-02 | 2    |                |

247

248 *The effect of JH on the expression of JH pathway genes and vitellogenins*

249 *Krüppel homolog-1 (Kr-h1)*, an established JH readout transcription factor, was on the top of the  
 250 list of JH upregulated genes showing a seven-, and a four-fold increase expression in the fat body and  
 251 brain, respectively (CA++JH vs CA-). Several additional JH signaling genes were also regulated by our  
 252 JH manipulations (CA++JH vs CA-;  $p < 0.05$  after FDR correction). These include the putative JH  
 253 receptor Methoprene-tolerant (*Met*, LOC100647695) which was downregulated by JH in both tissues, and  
 254 several insulin-pathway genes (e.g., *insulin-like growth factor 1* (LOC100648980); the insulin receptor

255 *chico* (LOC100644779); the insulin binding protein *Itl* (LOC100649210); see Supp Tables 2 and 3). We  
256 identified orthologs for all four Vitellogenin (*Vg*) paralogs previously described for the honey bee  
257 (Salmela et al., 2016, Supp. Fig. 3A). Vitellogenin (*Vg*) is a conserved yolk protein that is upregulated by  
258 JH in most insects but shows a complex and variable interaction with JH in social insects such as honey  
259 bees and ants. The predicted *Vg* transcript was the second most abundant transcript in the fat body (4.9%  
260 of all transcripts in the control group) and is upregulated by JH (22.5 fold in CA-+JH vs CA-) with over  
261 12K, 24K and 35K counts per million (cpm) in the CA-+JH, Control, and the Sham groups, respectively,  
262 but only 600 cpm in the CA- group. *Vg* transcript abundance was much lower in the brain, but it seems to  
263 be similarly upregulated by JH (Supp. Fig. 3B left). Fat body *Vg* transcript abundance was much higher  
264 compared to the other three *Vg*-like paralogs. Its overall high expression in the fat body and upregulation  
265 by JH support the premise that this *Vg* paralog is the major yolk protein precursor in bumble bees. The *Vg*  
266 *like A* paralog was not detected in the brain and was downregulated by JH in the fat body (Supp. Fig. 3B  
267 middle left). The *Vg like B* paralog was not effected by JH in any of the tissues (Supp. Fig. 3B middle  
268 right). The *Vg like-c* paralog expression was opposite to *Vg*: Its transcript is more abundant in the brain  
269 compared to the fat body and is downregulated by JH (Supp. Fig. 3B right). Our findings here for *Vg* and  
270 *Kr-hl* were similar to previous studies (Shpigler et al., 2014; Shpigler et al., 2010) providing validation  
271 for our RNAseq analyses.

## 272 **Transcripts differentially expressed in the brain of dominant and subordinate queenless workers**

273 The results reported above for hormone manipulations are consistent with results we obtained for  
274 brain transcriptomes of behaviorally dominant ( $\alpha$ ) and subordinate ( $\gamma$ ) queenless workers, which naturally  
275 have high and low JH titers, respectively (Bloch, Borst, et al. 2000). Although none of the DEG differs  
276 significantly after FDR correction (Supp Table 7), the 613 transcripts that were differentially expressed ( $p$   
277  $< 0.05$ , before FDR correction) show interesting similarities to the effect of JH in the manipulation  
278 experiment. First, more transcripts show a trend of lower abundance (361, 59%) in the dominant (high  
279 JH) individuals. Second, genes downregulated in the dominant bees were enriched for three pathways  
280 related to protein processing, “Protein export” (8/16 genes FE = 9.8, FDR  $p = 0.0003$ ) “Protein  
281 processing in endoplasmic reticulum” (14/88 genes FE = 3.1, FDR  $p = 0.005$ ) and “cytosolic ribosome  
282 proteins” (14/84 genes, FE = 4.34,  $p = 0.003$ , Fig. 5A, Supp Table 8). Third, all of the fourteen cytosolic  
283 ribosomal proteins that showed a trend towards downregulation in the dominant individuals (Fig 5A),  
284 were significantly downregulated also by JH treatment (CA- vs. three control groups). Although the  
285 interpretation of this experiment is difficult because of the lack of differences significance after FDR  
286 correction, the observed trends are consistent with the premise that some processed that we identified as

287 down-regulated by JH in the manipulation experiment, are similarly downregulated in the brain of  
288 workers with naturally high JH titers.

289 **JH regulated genes in the worker fat body are also differentially expressed between reproductive**  
290 **and non-reproductive queens that naturally differ in JH titers**

291 To further explore the links between our hormone manipulation and JH-mediated reproductive  
292 physiology, we analyzed data from a database of *Bombus terrestris* queens in which JH is involved in  
293 reproduction physiology (Röseler and Röseler 1986, 1988). We compared our list of fat body JH-  
294 regulated transcripts with a dataset of DEGs in the fat body of queens at various lifecycle stages (young  
295 mated, and egg-laying queens; (Amsalem, et al. 2015)). We identified in our dataset 3523 out of the 4127  
296 genes reported in the queen's study, 901 of which were regulated by JH in our data (CA- + JH vs CA-),  
297 and 1356 between young and egg-laying queens. The overlap of 436 genes between these two gene sets  
298 was statistically significant (hypergeometric test  $p < 0.001$ ; Fig. 5B top). The expression of these common  
299 genes was positively correlated (Person correlation test:  $R^2 = 0.33$ ,  $p = 5.1E-39$ , Fig. 5B bottom). The  
300 gene expression profile of reproductive queens is overall similar to that of workers with high JH levels  
301 (CA+JH), whereas that of young mated queens is similar to workers with low JH levels (CA-). This set  
302 of overlapping DEGs were enriched for several KEGG pathways including: "mitochondrion", "carbon  
303 metabolism", "proteasome", "oxidation phosphorylation", and "citrate cycle". These findings are  
304 consistent with the premise that JH regulates similar genes and molecular processes in the fat body of  
305 queens and workers (Supp Table 9).



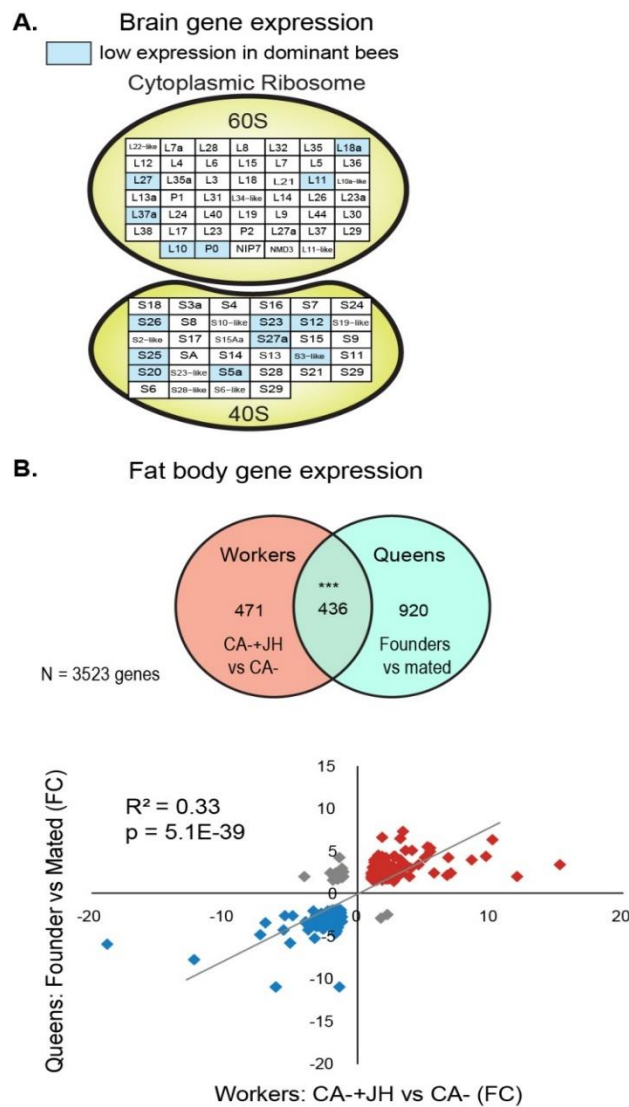

306 **Figure 5: Differential gene expression in bumble bees naturally differing in JH titers.** (A) Scheme of  
 307 the cytosolic ribosome (details as in Fig. 4) in the brain of dominant compared to subordinate orphan  
 308 workers which are assumed to have high and low JH levels, respectively. Transcripts of genes that were  
 309 differentially expressed before FDR correction (row p-value < 0.05) are marked in a light color (light blue  
 310 – lower in dominant individuals). None of the genes show statistically significant differences after FDR  
 311 correction. (B) Comparison of fat body transcripts regulated by JH in workers (CA-+JH vs CA-) and fat  
 312 body transcripts differential expressed between founders and mated queens that are assumed to have high  
 313 and low JH titers, respectively (queen data from: Amsalem, et al. 2015). Upper panel: Venn diagram of  
 314 differentially expressed genes between queen's life stage and workers with manipulated JH levels. Lower  
 315 panel: Correlation of expression level for 436 fat body transcripts differentially expressed in the two data  
 316 sets. Each diamond represents one DEG, upregulation is depicted in red, downregulation in blue, opposite  
 317 direction in grey. The  $R^2$  was obtained from a Pearson correlation test; \*\*\* -  $p < 0.0001$ .

## 318 **JH regulates different genes in the brains of bumble bee and honey bee workers**

319           Given that in honey bees high JH titers are not associated with ovary activation and reproduction,  
320 but rather with the foraging activity of sterile workers, we hypothesized that JH regulates different  
321 processes in the brain of the two species. To address this hypothesis, we compared our findings to a  
322 microarray study in which honey bees were treated with the JH analog methoprene (Whitfield et al.,  
323 2006). We identified in our dataset 2595 of the 3065 probes spotted on the honey bee microarray (Supp  
324 Table 10). Out of this set, 454 transcripts in the brains of honey bees and 427 in bumble bees are  
325 regulated by JH. The effect of JH treatment differed between the two species. Whereas in the honey bee  
326 62% of the DEGs were upregulated by the JH analog, in the bumble bee, 66% of the DEGs were  
327 downregulated (Z-test,  $Z = 7.7$ ,  $p < 0.001$ ). Ninety-nine genes were regulated by JH in both species which  
328 represent a significant overlap (Hypergeometric test,  $p = 0.0006$ , Fig. 6A). Sixty-eight of these genes  
329 were regulated in the same direction and 31 in the opposite direction (i.e., up in one species and down in  
330 the other,  $\chi^2$  test for independence,  $p = 5.9E-5$ ). The genes in agreement were enriched for the KEGG  
331 pathway “oxidative phosphorylation” (4/27 genes, FE = 10.1; FDR  $p = 0.06$ , including genes of the v-  
332 type ATPase) suggesting that JH has the same effect on this pathway in both species. The commonly  
333 downregulated genes were not enriched for any pathway. The oppositely regulated genes were not  
334 significantly enriched to any GO term, but include the *Vg like-C* which was downregulated by JH in the  
335 bumble bee (Supp Fig. 3B) and upregulated by methoprene treatment in the honey bee.

336           JH regulated different genes and pathways in the two species. Most of the JH regulated pathways  
337 that we identified above for the bumble bees, using a larger set of DEGs, were also enriched here with a  
338 smaller set of DEGs. These include upregulation of the KEGG pathways “Lysosome” (6/20 genes;  
339 FE=3.7,  $p = 0.004$ ) and “Glycolysis” (4/14 genes; FE=9.7,  $p = 0.08$ ), and downregulation of the  
340 “Cytosolic ribosome” (28/34 genes; FE=8.6,  $p = 7.1E-21$ , Fig. 6B). None of these pathways were  
341 enriched in the set of genes regulated by JH analog treatment in honey bees. Rather, the significantly  
342 enriched KEGG pathways include “Oxidative phosphorylation” (11/27 genes; FE=3.9,  $p = 0.008$ ) and  
343 “Proteasome” (8/23 genes; FE=3.4,  $p=0.15$ ), which were upregulated, opposite of the pattern in bumble  
344 bees (Fig. 6C). No pathways were significantly downregulated by JH analog in the honey bee. These  
345 analyses suggest that by contrast to the bumble bee, the expression of pathways involved in protein  
346 production and turnover is not downregulated by JH in the honey bee brain.

A.

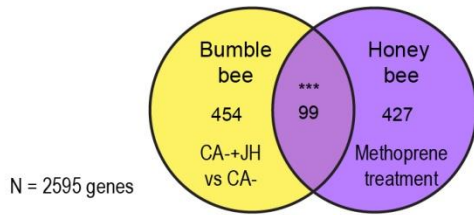

B.

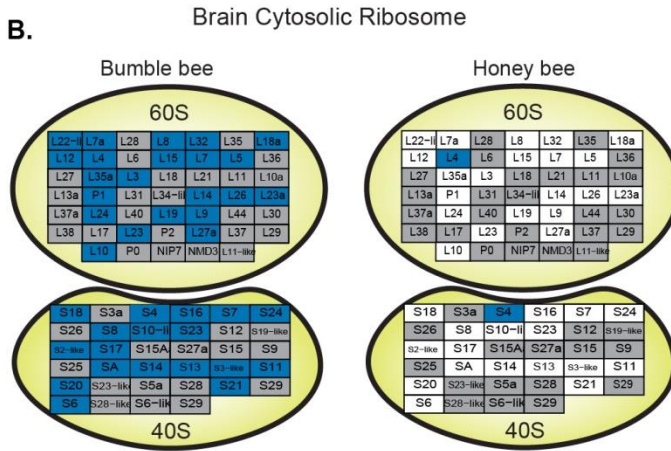

Brain Proteasome

C.

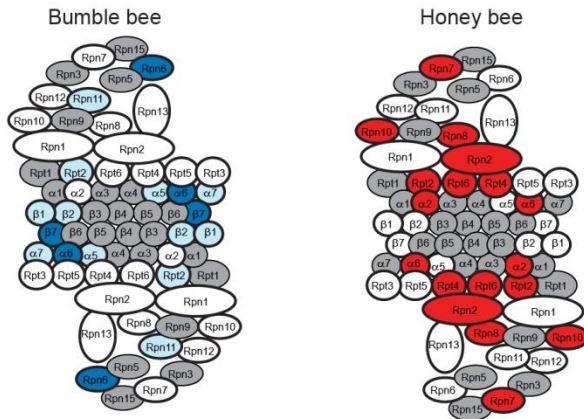

Downregulated by JH / methoprene FDR<0.05 Raw p<0.05 Not sig  
 Upregulated by JH / methoprene FDR<0.05 Raw p<0.05 NA

347

348 **Figure 6: JH regulated genes in the brains of bumble bee compared with honey bee workers.** (A) A  
 349 Venn diagram comparing the sets of JH regulated genes in the bumble bee and JH analog (methoprene)  
 350 regulated genes in the honey bee brain (data from: Whitfield, et al. 2006). (B) A scheme summarizing JH  
 351 influence on the cytosolic ribosomal protein genes. (C) A scheme summarizing JH influence on the  
 352 proteasomal protein gene. Details as in Fig. 4 but the analyses were limited to genes that were found in  
 353 both data sets. Other details as in Fig. 4; grey staining – a ribosomal protein encoded by a gene not found  
 354 in the common data set.

## 355 Discussion

356 Our transcriptomic analyses show that in bumble bee workers JH has diverse and mostly tissue-  
357 specific effects in the brain and the fat body. JH activates the mitochondrion and additional metabolic and  
358 biosynthetic processes in the fat body, an organ pivotal in energy storage and utilization in insects (Arrese  
359 and Soulages 2010). These findings are in line with earlier studies showing that JH activates the ovaries  
360 and several exocrine glands (Shpigler, et al. 2014) indicating that JH is the major gonadotropin of the  
361 bumble bee. The effects are different in the brain in which high JH downregulates the expression of many  
362 genes showing significant enrichment for pathways regulating protein turnover such as ribosomal, and  
363 proteasomal proteins. JH also upregulates the lysosome that recycles proteins and organelles. Similar  
364 downregulation of pathways controlling protein turn-over and increase in lysosome activity is commonly  
365 associated with aging or stress in diverse organisms (Ryazanov and Nefsky 2002; Marion, et al. 2004;  
366 Lim and Zoncu 2016), but have never been shown to be down-regulated by increase fertility. Decreased  
367 protein biosynthesis may compromise brain maintenance and processes such as learning and long-term  
368 memory (Hernandez, et al. 2015). These JH effects in the bumble bee brain point to a previously  
369 unrecognized cost of gonadotropic hormones to the brain in the form of decrease protein biosynthesis and  
370 increase organelle recycling. We further suggest that this cost would have been maladaptive to highly  
371 eusocial honey bees which maintain exceptionally high fertility over extended periods lasting over several  
372 years. Consistent with this premise, we did not find evidence for a similar effect of JH on brain gene  
373 expression in the honey bee in which JH does not function as a gonadotropin in adult females

374 We found that most *B. terrestris* fat body DEGs are upregulated by JH. The upregulated genes are  
375 enriched for mitochondria genes that include key metabolic pathways such as citrate acid cycle,  
376 glycolysis, and oxidative phosphorylation, suggesting that as in other insects, JH activates the bumble bee  
377 fat body (Glinka and Wyatt 1996; Panaitof and Scott 2006; Yamamoto, et al. 2013). Upregulated genes  
378 were also enriched for mitoribosomal proteins which are necessary for translating the JH regulated  
379 transcripts into proteins. The fat body transcriptome analysis is consistent with JH upregulating ATP  
380 production which is necessary to support the high energetic demands of the activated reproductive  
381 system, and the biosynthesis of yolk proteins (Arrese and Soulages 2010). Indeed, we found that the fat  
382 body expresses large amounts of the *Vg* transcript, accounting for about 5% of the total transcripts in the  
383 fat body of bees with high JH titers. To test if the fat body is similarly activated in bees in which JH  
384 increases naturally, we compared our findings to a transcriptomic database of bumble bee queens which  
385 naturally vary in JH titers. We found that the set of fat body transcripts that we found to be regulated by  
386 artificial manipulation of JH titers in the worker fat body (Fig. 2) significantly overlap with genes  
387 differentially expressed between egg-laying founders bumble bee queens and pre-diapause mated gynes

388 which naturally have high and low JH titers, respectively (Amsalem, et al. 2015). Thus, as in other insects  
389 (Stepien, et al. 1988), JH-regulated reproduction in the bumble bee is associated with a significant  
390 increase in energy demand and resource utilization. Elevated metabolism in reproductive females is not  
391 unique to bumble bees. For example, in mammals mitochondria activity is elevated in the trophoblast and  
392 placenta of pregnant females (Van Blerkom 2009; Ramalho-Santos and Amaral 2013). This evidence for  
393 the high metabolic cost of JH raises the question of how can the body meet these increasing energy  
394 demands of multiple tissues? One common way for contending with this challenge is to store sufficient  
395 energy before the reproductive season. Our findings suggest an additional, not mutually exclusive  
396 mechanism, in which some tissues pay a cost by reducing metabolism or biosynthetic activity.

397 By contrast to the fat body, in the brain, overall more genes were downregulated by JH. The  
398 pathways showing the most consistent down-regulation are the cytosolic ribosome and translation  
399 elongation. This transcriptomic signature suggests that high JH levels downregulate protein biosynthesis  
400 in the brain. Fatty acid metabolism pathways were also downregulated. The brain uses fatty acids as  
401 metabolites and also as building blocks of cell and organelles membranes (Tracey, et al. 2018); deficiency  
402 in fatty acid impairs learning abilities in honey bees (Arien, et al. 2015). On the other hand, genes  
403 encoding proteins of the lysosome and phagosome were upregulated by JH. The lysosome is central for  
404 degradation and recycling of organelles and macromolecules, including proteins (Appelqvist, et al. 2013;  
405 Settembre, et al. 2013). The increased expression of genes encoding lysosomal and phagosomal proteins  
406 thus suggests that JH activates the degradation of available organelles, which can be then reused as  
407 building blocks for essential proteins and lipids. Similar upregulation of lysosomal protein genes and  
408 downregulation of ribosomal protein genes is associated with conditions of starvation, stress, and aging in  
409 other species (Marion, et al. 2004; Settembre, et al. 2013; Mony, et al. 2016). Do similar transcriptomic  
410 changes exist in the brain of bees in which JH titers increase naturally? We addressed this question by  
411 studying orphan workers in which JH levels are positively correlated with dominance rank (Bloch, et al.  
412 1996; Bloch, Simon, et al. 2000). Although the interpretation of this experiment is somewhat difficult  
413 because none of the 613 differentially expressed transcripts were statistically significant after FDR  
414 correction for multiple comparisons, there was a very clear and consistent trend. The cytosolic ribosome  
415 proteins expression in the brain of the dominant bees, that typically have high JH titers, were  
416 downregulated showing a response that is overall consistent with the pattern we found in workers for  
417 which we manipulated JH titers.

418 Our findings are consistent with additional evidence for a cost for a gonadotropic JH in insects  
419 (for a recent review see (Rodrigues and Flatt 2016). For example, *Drosophila* flies treated with a JH  
420 analog show reduced lifespan (Yamamoto, et al. 2013) and compromised immune functions (Schwenke,

421 et al. 2016; Schwenke and Lazzaro 2017). JH also appears to mediate a trade-off between fecundity and  
422 life span in *Polistes* paper wasps (Tibbetts and Huang 2010; Tibbetts and Crocker 2014). In butterflies  
423 individuals treated with a JH analog showed reduced learning performance (Snell-Rood, et al. 2011). The  
424 evidence of costs of high JH titers in insects is reminiscent of the costs of testosterone (and other  
425 androgens), the male gonadotropic hormone of vertebrates (Wingfield, et al. 1990; Wingfield 2017).  
426 These apparent costs of high gonadotropic hormone levels raise the question of how can the exceptionally  
427 fertile queens of highly eusocial species such as honey bees keep on reproducing over extended periods  
428 without paying these costs? Or in other words, how do highly eusocial insects defy the evolutionary  
429 ancient trade-off between reproduction and maintenance/ longevity? We hypothesized that maintaining  
430 such exceptional fertility over long periods required evolutionary modifications in hormonal signaling  
431 pathways which alleviate the ancient cost of high JH titers (Bloch, et al. 2009). We tested this hypothesis  
432 by re-analyzing a previously published dataset of brain gene expression of honey bees treated with a JH  
433 analog. Consistent with the idea that JH signaling was modified, we found that in the honey bee, in which  
434 JH is not a gonadotropin, high JH titers were associated with an overall up-, not down-regulation of brain  
435 gene expression and with no down-regulated expression of ribosomal proteins or other pathways involved  
436 in protein synthesis. These findings are consistent with evidence that JH treatment has a positive effect on  
437 some learning tasks in honey bees (McQuillan, et al. 2014). The influences of JH on the fat body also  
438 differ substantially between the honey bee and the bumble bee. Whereas in the bumble bee JH overall  
439 upregulates metabolic and protein synthesis pathways, in the honey bee JH down-regulates these  
440 pathways (Lu, et al. 2017). Thus, whereas in bumble bees JH seems to downregulate processes in the  
441 brain and activate the fat body, in the honey bee it seems to overall activate the brain while  
442 downregulating the fat body.

443 We speculate that in the ancestral solitary and annual bees, JH functioned as the major  
444 gonadotropin activating the ovaries and other tissues related to reproduction while reducing investment in  
445 tissues such as the brain (Hartfelder 2000; Smith, et al. 2013; Kapheim and Johnson 2017). We further  
446 assume that the cost of high JH is manageable for these short-lived, low fertility, bees. The evolution of  
447 sociality was associated with the development of a reproductive skew in which some females (i.e.,  
448 queens) became significantly more fertile compared to solitary bees (Michener 1974). Nevertheless,  
449 species with an annual life cycle apparently could still sustain relatively short-term costs because the life  
450 expectancy of reproductive queens is relatively low and they increase their fitness by sacrificing long-  
451 term maintenance for optimizing fertility during their limited reproductive period. The evolution of  
452 division of labor can further mitigate these costs because the cognitively demanding foraging activities  
453 are performed by individuals with low JH titers and undeveloped ovaries as typical to bumble bees  
454 (Cameron and Robinson 1990; Shpigler, et al. 2016). These costs, however, are not bearable for long-

455 lived highly fertile queens which are a hallmark of advanced eusociality. The transition to this stage in the  
456 evolution of sociality required decoupling the reproduction-maintenance/longevity tradeoff. Although one  
457 can speculate on several solutions for reducing this cost (e.g., modifications only in JH signaling in the  
458 brain), it appears that in honey bees and some ants the evolution of JH signaling involved substantial  
459 reduction in the gonadotropic functions of JH, perhaps because ancestrally JH regulated life history  
460 switches between reproductive and non-reproductive stages that affect many tissues in the body  
461 (Rodrigues and Flatt 2016). When JH was freed from its role as the major coordinator of reproductive  
462 tissues, it can regulate (old or new) functions such as age-related division of labor and other complex  
463 behaviors. Thus, our findings link two remarkable physiological traits of advanced eusocial insects: first,  
464 they defy the widespread trade-off between reproduction and longevity, second, JH, which is the ancient  
465 insect gonadotropin, does not appear to regulate fertility in some social insects such as honey bees and  
466 some ants - a riddle posed about three decades ago but still has no satisfactory answer (Cameron and  
467 Robinson 1990; West-Eberhard and Turillazzi 1996). Our findings suggest that these two traits are linked  
468 because high JH titers would have caused a serious cost to queens that are highly fertile over extended  
469 periods, and therefore the evolution of eusociality in these lineages was associated with modifications in  
470 JH signaling pathways.

471

## 472 **Acknowledgments**

473 We thank Yafit Brener, Gal Hadad and Adam J Siegel for assistance with bee collection, Nadav Yayon  
474 for manufacturing the surgical table. This work was supported by research grants from the US–Israel  
475 Binational Agricultural Research and Development (BARD) fund (IS-4418-11 to G.B., G.E.R, and M.B),  
476 the Vaadia-BARD Postdoctoral Fellowship (award No. FI-462-2012 to H.Y.S), and the Israeli Ministry of  
477 Science Yitzhak Shamir fellowship (to H.Y.S)

478 **Supplementary material**

479 **Supp Table 1: JH replacement therapy rescued the expression level of hundreds of genes in the**  
480 **brain and fat body (in the end of the manuscript)**

481 *Supp Excel files (not included in the initial submission)*

482 **Supp Table 2: The effect of JH on bumb lebee workers fat body gene expression**

483 **Supp Table 3: The effect of JH on bumble bee workers brain gene expression**

484 **Supp Table 4a: Fat body WGCNA and modules GO analysis.**

485 **Supp Table 4b: Brain WGCNA and modules GO analysis.**

486 **Supp Table 5: Brain and Fat body gene expression comparison, CA- vs CA-+JH**

487 **Supp Table 6a: Fat body KEGG and GO enrichment analysis for JH regulated genes.**

488 **Supp Table 6b: Brain KEGG and GO enrichment analysis for JH regulated genes.**

489 **Supp Table 7: Dominant vs subordinate bumble bee workers gene expression.**

490 **Supp Table 8: Dominant vs subordinate GO enrichment analysis.**

491 **Supp Table 9: Comparison of fat body gene expression between bumble bee workers and queens**  
492 **(Amsalem et al., 2015)**

493 **Supp Table 10: Comparison of JH related genes in bumble bees and honey bees (Whitfield et al.,**  
494 **2006).**

495 *Supp figures*

496 **Supp Fig. 1: WGCNA analysis of gene expression in the fat body. (in the end of the manuscript)**

497 **Supp Fig. 2: WGCNA analysis of gene expression in the brain. (in the end of manuscript)**

498 **Supp Fig. 3: The influence of JH on the expression of Vitellogenins. (in the end of the manuscript)**



499 **References**

- 500 Amsalem E, Galbraith DA, Cnaani J, Teal PEA, Grozinger CM. 2015. Conservation and modification of  
501 genetic and physiological toolkits underpinning diapause in bumble bee queens. *Molecular Ecology*  
502 24:5596-5615.
- 503 Amsalem E, Teal P, Grozinger CM, Hefetz A. 2014. Precocene-I inhibits juvenile hormone biosynthesis,  
504 ovarian activation, aggression and alters sterility signal production in bumble bee (*Bombus terrestris*)  
505 workers. *Journal of Experimental Biology* 217:3178-3185.
- 506 Appelqvist H, Waster P, Kagedal K, Ollinger K. 2013. The lysosome: from waste bag to potential  
507 therapeutic target. *Journal of Molecular Cell Biology* 5:214-226.
- 508 Arien Y, Dag A, Zarchin S, Masci T, Shafir S. 2015. Omega-3 deficiency impairs honey bee learning.  
509 *Proceedings of the National Academy of Sciences of the United States of America* 112:15761-15766.
- 510 Arrese EL, Soulages JL. 2010. Insect Fat Body: Energy, Metabolism, and Regulation. *Annual Review of*  
511 *Entomology* 55:207-225.
- 512 Benjamini Y, Hochberg Y. 1995. Controlling the false discovery rate - a practical and powerful approach  
513 to multiple testing. *Journal of the Royal Statistical Society Series B-Statistical Methodology* 57:289-  
514 300.
- 515 Bloch G, Borst DW, Huang ZY, Robinson GE, Cnaani J, Hefetz A. 2000. Juvenile hormone titers,  
516 juvenile hormone biosynthesis, ovarian development and social environment in *Bombus terrestris*.  
517 *Journal of Insect Physiology* 46:47-57.
- 518 Bloch G, Borst DW, Huang ZY, Robinson GE, Hefetz A. 1996. Effects of social conditions on Juvenile  
519 Hormone mediated reproductive development in *Bombus terrestris* workers. *Physiological*  
520 *Entomology* 21:257-267.
- 521 Bloch G, Shpigler H, Wheeler DE, Robinson GE. 2009. Endocrine Influences on the Organization of  
522 Insect Societies. In: Arnold AP, Etgen AM, Fahrbach SE, Rubin RT, editors. *Hormones, Brain and*  
523 *Behavior*. San Diego: Academic Press. p. 1027-1068.
- 524 Bloch G, Simon T, Robinson GE, Hefetz A. 2000. Brain biogenic amines and reproductive dominance in  
525 bumble bees (*Bombus terrestris*). *Journal of Comparative Physiology a-Sensory Neural and*  
526 *Behavioral Physiology* 186:261-268.
- 527 Cameron SA, Robinson GE. 1990. Juvenile-hormone does not affect division of labor in bumble bee  
528 colonies (Hymenoptera, Apidae). *Annals of the Entomological Society of America* 83:626-631.
- 529 Christensen A, Bentley GE, Cabrera R, Ortega HH, Perfito N, Wu TJ, Micevych P. 2012. Hormonal  
530 Regulation of Female Reproduction. *Hormone and Metabolic Research* 44:587-591.

- 531 De Loof A, Baggerman G, Breuer M, Claeys I, Cerstiaens A, Clynen E, Janssen T, Schoofs L, Broeck JV.  
532 2001. Gonadotropins in insects: An overview. *Archives of Insect Biochemistry and Physiology*  
533 47:129-138.
- 534 Elsik CG, Worley KC, Bennett AK, Beye M, Camara F, Childers CP, de Graaf DC, Debyser G, Deng J,  
535 Devreese B, et al. 2014. Finding the missing honey bee genes: lessons learned from a genome  
536 upgrade. *Bmc Genomics* 15.
- 537 Glinka AV, Wyatt GR. 1996. Juvenile hormone activation of gene transcription in locust fat body. *Insect*  
538 *Biochemistry and Molecular Biology* 26:13-18.
- 539 Greber BJ, Ban N. 2016. Structure and Function of the Mitochondrial Ribosome. *Annual Review of*  
540 *Biochemistry*, Vol 85 85.
- 541 Hartfelder K. 2000. Insect juvenile hormone: from "status quo" to high society. *Brazilian Journal of*  
542 *Medical and Biological Research* 33:157-177.
- 543 Hernandez AI, Alarcon JM, Allen KD. 2015. New ribosomes for new memories? *Communicative &*  
544 *integrative biology* 8:e1017163-e1017163.
- 545 Huang DW, Sherman BT, Lempicki RA. 2009. Systematic and integrative analysis of large gene lists  
546 using DAVID bioinformatics resources. *Nature Protocols* 4:44-57.
- 547 Kapheim KM, Johnson MM. 2017. Juvenile hormone, but not nutrition or social cues, affects  
548 reproductive maturation in solitary alkali bees (*Nomia melanderi*). *Journal of Experimental Biology*  
549 220:3794-3801.
- 550 Lim CY, Zoncu R. 2016. The lysosome as a command-and-control center for cellular metabolism. *Journal*  
551 *of Cell Biology* 214:653-664.
- 552 Lu C-Y, Chuang Y-L, Hsu C-Y. 2017. Aging results in a decline in cellular energy metabolism in the  
553 trophocytes and oenocytes of worker honeybees (*Apis mellifera*). *Apidologie* 48:761-775.
- 554 Marion RM, Regev A, Segal E, Barash Y, Koller D, Friedman N, O'Shea EK. 2004. Sfp1 is a stress- and  
555 nutrient-sensitive regulator of ribosomal protein gene expression. *Proceedings of the National*  
556 *Academy of Sciences of the United States of America* 101:14315-14322.
- 557 McQuillan HJ, Nakagawa S, Mercer AR. 2014. Juvenile hormone enhances aversive learning  
558 performance in 2-day old worker honey bees while reducing their attraction to queen mandibular  
559 pheromone. *PLoS ONE* 9:e112740-e112740.
- 560 Michener CD. 1974. *The social behavior of bees : a comparative study*. Cambridge, Mass.: Belknap  
561 Press.
- 562 Mony VK, Benjamin S, O'Rourke EJ. 2016. A lysosome-centered view of nutrient homeostasis.  
563 *Autophagy* 12:619-631.

- 564 Panaitof SC, Scott MP. 2006. Effect of juvenile hormone on vitellogenin gene expression in the fat body  
565 of burying beetles, *Nicrophorus orbicollis*. *Archives of Insect Biochemistry and Physiology* 63:82-91.
- 566 Pandey A, Motro U, Bloch G. 2019. Juvenile hormone interacts with multiple factors to modulate  
567 aggression and dominance in groups of orphan bumble bee (*Bombus terrestris*) workers. *Hormones*  
568 and behavior:104602-104602.
- 569 Ramalho-Santos J, Amaral S. 2013. Mitochondria and mammalian reproduction. *Molecular and Cellular*  
570 *Endocrinology* 379:74-84.
- 571 Riddiford LM. 2012. How does juvenile hormone control insect metamorphosis and reproduction?  
572 *General and Comparative Endocrinology* 179:477-484.
- 573 Riddiford LM. 2008. Juvenile hormone action: A 2007 perspective. *Journal of Insect Physiology* 54:895-  
574 901.
- 575 Robinson GE, Vargo EL. 1997. Juvenile hormone in adult eusocial hymenoptera: Gonadotropin and  
576 behavioral pacemaker. *Archives of Insect Biochemistry and Physiology* 35:559-583.
- 577 Robinson MD, McCarthy DJ, Smyth GK. 2010. edgeR: a Bioconductor package for differential  
578 expression analysis of digital gene expression data. *Bioinformatics* 26:139-140.
- 579 Rodrigues MA, Flatt T. 2016. Endocrine uncoupling of the trade-off between reproduction and somatic  
580 maintenance in eusocial insects. *Current Opinion in Insect Science* 16:1-8.
- 581 Roy S, Saha TT, Zou Z, Raikhel AS. 2018. Regulatory Pathways Controlling Female Insect  
582 Reproduction. *Annu Rev Entomol* 63:489-511.
- 583 Ryazanov AG, Nefsky BS. 2002. Protein turnover plays a key role in aging. *Mechanisms of Ageing and*  
584 *Development* 123:207-213.
- 585 Röseler PF. 1977. Juvenile hormone control of oogenesis in bumblebee workers, *Bombus-terrestris*.  
586 *Journal of Insect Physiology* 23:985-992.
- 587 Röseler PF, Röseler I. 1986. Caste specific differences in fat-body glycogen-metabolism of the  
588 bumblebee, *Bombus-terrestris*. *Insect Biochemistry* 16:501-508.
- 589 Röseler PF, Röseler I. 1988. Influence of juvenile-hormone on fat-body metabolism in ovarioectomized  
590 queens of the bumblebee, *Bombus-terrestris*. *Insect Biochemistry* 18:557-563.
- 591 Röseler PF, Röseler I. 1978. Studies on regulation of juvenile hormone titer in bumblebee workers,  
592 *Bombus-terrestris*. *Journal of Insect Physiology* 24:707-713.
- 593 Sadd BM, Barribeau SM, Bloch G, de Graaf DC, Dearden P, Elsik CG, Gadau J, Grimmelikhuijzen CJP,  
594 Hasselmann M, Lozier JD, et al. 2015. The genomes of two key bumblebee species with primitive  
595 eusocial organization. *Genome Biology* 16.
- 596 Salmela H, Stark T, Stucki D, Fuchs S, Freitak D, Dey A, Kent CF, Zayed A, Dhaygude K, Hokkanen H,  
597 et al. 2016. Ancient Duplications Have Led to Functional Divergence of Vitellogenin-Like Genes

- 598 Potentially Involved in Inflammation and Oxidative Stress in Honey Bees. *Genome Biology and*  
599 *Evolution* 8:495-506.
- 600 Schwenke RA, Lazzaro BP. 2017. Juvenile Hormone Suppresses Resistance to Infection in Mated Female  
601 *Drosophila melanogaster*. *Current Biology* 27:596-601.
- 602 Schwenke RA, Lazzaro BP, Wolfner MF. 2016. Reproduction-Immunity Trade-Offs in Insects. *Annual*  
603 *Review of Entomology*, Vol 61 61:239-256.
- 604 Settembre C, Fraldi A, Medina DL, Ballabio A. 2013. Signals from the lysosome: a control centre for  
605 cellular clearance and energy metabolism. *Nature Reviews Molecular Cell Biology* 14:283-296.
- 606 Shpigler H, Amsalem E, Huang ZY, Cohen M, Siegel AJ, Hefetz A, Bloch G. 2014. Gonadotropic and  
607 Physiological Functions of Juvenile Hormone in Bumblebee (*Bombus terrestris*) Workers. *Plos One* 9.
- 608 Shpigler H, Patch HM, Cohen M, Fan Y, Grozinger CM, Bloch G. 2010. The transcription factor Kruppel  
609 homolog 1 is linked to hormone mediated social organization in bees. *Bmc Evolutionary Biology* 10.
- 610 Shpigler HY, Siegel AJ, Huang ZY, Bloch G. 2016. No effect of juvenile hormone on task performance  
611 in a bumblebee (*Bombus terrestris*) supports an evolutionary link between endocrine signaling and  
612 social complexity. *Horm Behav* 85:67-75.
- 613 Smith AR, Kapheim KM, Perez-Ortega B, Brent CS, Wcislo WT. 2013. Juvenile hormone levels reflect  
614 social opportunities in the facultatively eusocial sweat bee *Megalopta genalis* (Hymenoptera:  
615 Halictidae). *Hormones and behavior* 63:1-4.
- 616 Snell-Rood EC, Davidowitz G, Papaj DR. 2011. Reproductive tradeoffs of learning in a butterfly.  
617 *Behavioral Ecology* 22:291-302.
- 618 Stepien G, Renaud M, Savre I, Durand R. 1988. Juvenile hormone increases mitochondrial activities in  
619 *Drosophila* cells. *Insect Biochemistry* 18:313-321.
- 620 Tibbetts EA, Crocker KC. 2014. The challenge hypothesis across taxa: social modulation of hormone  
621 titres in vertebrates and insects. *Animal Behaviour* 92:281-290.
- 622 Tibbetts EA, Huang ZY. 2010. The Challenge Hypothesis in an Insect: Juvenile Hormone Increases  
623 during Reproductive Conflict following Queen Loss in *Polistes* Wasps. *American Naturalist* 176:123-  
624 130.
- 625 Tracey TJ, Steyn FJ, Wolvetang EJ, Ngo ST. 2018. Neuronal Lipid Metabolism: Multiple Pathways  
626 Driving Functional Outcomes in Health and Disease. *Frontiers in Molecular Neuroscience* 11.
- 627 Tufail M, Takeda M. 2008. Molecular characteristics of insect vitellogenins. *Journal of Insect Physiology*  
628 54:1447-1458.
- 629 Van Blerkom J. 2009. Mitochondria in early mammalian development. *Seminars in Cell &*  
630 *Developmental Biology* 20:354-364.

- 631 West-Eberhard MJ, Turillazzi S. 1996. Wasp societies as microcosms for the study of development and  
632 evolution. *Natural history and evolution of paper-wasps.*:290-317.
- 633 Whitfield CW, Ben-Shahar Y, Brillet C, Leoncini I, Crauser D, Le Conte Y, Rodriguez-Zas S, Robinson  
634 GE. 2006. Genomic dissection of behavioral maturation in the honey bee. *Proceedings of the National  
635 Academy of Sciences of the United States of America* 103:16068-16075.
- 636 Wilson EO. 1971. *The insect societies*. Cambridge, Mass.: Belknap Press of Harvard University Press.
- 637 Wingfield JC. 2017. The challenge hypothesis: Where it began and relevance to humans. *Hormones and  
638 Behavior* 92:9-12.
- 639 Wingfield JC, Hegner RE, Dufty AM, Ball GF. 1990. The challenge hypothesis - theoretical implications  
640 for patterns of testosterone secretion, mating systems, and breeding strategies. *American Naturalist*  
641 136:829-846.
- 642 Wyatt GR. 1997. Juvenile hormone in insect reproduction - a paradox? *European Journal of Entomology*  
643 94:323-333.
- 644 Yamamoto R, Bai H, Dolezal AG, Amdam G, Tatar M. 2013. Juvenile hormone regulation of *Drosophila*  
645 aging. *Bmc Biology* 11.

## 646 **Material and methods**

### 647 **Bees**

648 For the RNAseq experiments, we collected *Bombus terrestris* workers from eight “donor” colonies.  
649 To reduce genetic variation, the donor colonies were founded by full-sister queens (genetic relatedness,  $r$   
650  $= 0.75$ ). Queen mating and colony initiation were performed by BioBee Biological Systems (Sde Eliyahu,  
651 Israel) according to standard rearing techniques. When these colonies contained a queen, 5-10 workers,  
652 and brood at all stages of development, they were shipped to the Hebrew University of Jerusalem. The  
653 colonies were placed in a wooden nesting box (21 x 21 x 12 cm) with a front wall and cover made of  
654 transparent acrylic plastic (Plexiglas<sup>TM</sup>). The nesting boxes with the bees were housed in an  
655 environmental chamber ( $28 \pm 1^\circ\text{C}$ ;  $50 \pm 5\%$  RH) in constant darkness at the Bee Research Facility at the  
656 Edmond J. Safra Campus of the Hebrew University of Jerusalem, Givat Ram, Jerusalem. The colonies  
657 were kept indoor and were fed *ad libitum* with commercial sugar syrup (70% sugar, purchased from  
658 Ployam Pollination Services, Kibbutz Yad Mordechai, Israel) and fresh pollen (collected by honey bees)  
659 mixed with sugar syrup. Bee collection and observations were done under dim-red light that the bees do  
660 not see well.

### 661 **The influence of JH on fat body and brain gene expression**

662 We manipulated JH levels by surgically removing the corpora allata (CA) glands (*allatectomy*), the  
663 only source of JH in insects (Riddiford 2008). We used our previous protocol as detailed in (Shpigler, et  
664 al. 2014). Briefly, newly emerged worker bees were collected (up to 18 hours after emerging from the  
665 pupa, easily recognized by their light body color) from donor colonies. At this age, the cuticle is relatively  
666 soft and easy to manipulate. We placed the collected callow bees in a cage (20x20x10 cm) provisioned  
667 with *ad libitum* sugar syrup and pollen. For the dissection, we anesthetized the bees on ice for 5-20 min  
668 (the variation in chilling duration was due to individual differences in body size, and a consequence of the  
669 dissection order as the bees were chilled in groups of four) and when immobile, fixed them under a  
670 stereoscopic microscope (Nikon SMZ645, X50) onto an ice-chilled metal stage using modeling clay. The  
671 dorsal side of the bee faced up and the head bent down to expose the thin neck cuticle connecting the  
672 thorax and the head. We used a fine scalpel to open a latitudinal incision in the posterior part of the head  
673 capsule. We then moved the inner membrane and trachea to expose the CA glands. Both corpora allata  
674 glands were gently grasped with fine forceps and detached. The entire procedure took between 2-5  
675 minutes, and the cuticle resumed its original shape; the incision appeared to self-seal within a few hours  
676 following the operation.

677 Sham-operated bees (*'Sham'*) were handled and dissected in a similar way, however, the CA were  
678 only touched gently and not detached. Control bees (*'Control'*) were anesthetized and handled similarly

679 but were not operated. At the end of the operation, the bees were placed in a small wooden cage (12x8x5  
680 cm), with other similarly manipulated bees, and were left to recover overnight in an incubator (32°C, 70%  
681 RH). On the second day, the surviving bees from each treatment group were assigned to groups of three,  
682 each transferred to a fresh, clean wooden cage with clear glass walls (12x5x8 cm). The average survival  
683 rate for the first day in the three experimental groups was 50% for the allatectomized ('CA-') bees, 80%  
684 for the sham, and 100% for the control bees. Bees that survive the first day after operation showed similar  
685 survival rates: Survival during days two to five was 86% (45/52) for the CA- bees, 94% (34/36) for the  
686 sham-treated bees, and 97% (35/36) for the control bees (Fisher exact test,  $p = 0.17$ ). Only groups in  
687 which all the three bees survived for the whole five days of the experiment were used for the RNAseq  
688 analysis. For replacement therapy, ('CA-+JH') half of the allatectomized groups were randomly chosen  
689 and treated as follows. The bees were chilled on ice for 3-5 minutes, and when anesthetized, were treated  
690 topically with 70 $\mu$ g of JH-III (Sigma, cat #: J-2000) dissolved in 3.5 $\mu$ l Dimethylformamide (DMF, J.T  
691 Backer, cat #: 7032), giving a final concentration of 20  $\mu$ g/ $\mu$ l. The JH solution was applied to the dorsal  
692 part of the thorax. JH treatment was done twice at day 2 and day 4 from emergence. Our previous study  
693 using this protocol showed that two tandem JH treatments successfully reverted the effect of CA removal  
694 on various JH regulated traits, including ovarian activity, wax secretion and *Vg* expression (Shpigler et  
695 al., 2014). On the same two days, we similarly handled and chilled the sham and CA- bees but treated  
696 them only with the vehicle (3.5 $\mu$ l DMF). The control bees were chilled on days 2 and 4, but otherwise  
697 untreated. Following treatment, the bees were returned to their original cages. The JH treatment did not  
698 affect the survival of the bees as the CA-+JH group survival (22/26) was not different from the CA- group  
699 (23/26; Fisher exact test,  $p = 1.0$ ). The bees from all treatment groups were placed in an incubator (28°C  $\pm$   
700 0.5°, 70%  $\pm$  5% RH) for four days and were monitored daily for survival. On day five from emergence,  
701 the bees were collected by flash freezing in liquid nitrogen and immediately transferred to individually  
702 marked centrifuge tubes on dry ice. The samples were kept in an ultra-freezer (-80°C) until tissues  
703 dissection.

#### 704 **The influence of dominance rank on brain gene expression**

705 We paint marked the workers of the control groups (see above) and carefully recorded their  
706 behavior. We performed two sets of observations (20 min each); the first, at the age of three days, and the  
707 second at the age of five days, just before collection. The dominance index was calculated following the  
708 method described by (Bloch, et al. 1996). Briefly, for each encounter of a pair of bees, we recorded which  
709 bee advanced and which retreated. The dominance index was defined as  $1 - \text{retreats} / \text{total encounters}$ ,  
710 and thus, ranges between 0 - 1. The bees were classified according to their dominance rank; the most  
711 dominant individual (highest score) in the triplet was dubbed " $\alpha$ ," the median " $\beta$ ," and the individual with  
712 the lowest rank " $\gamma$ ." For the RNAseq analysis, we used only the  $\alpha$  and  $\gamma$  ranked individuals. Eight

713 dominant and seven subordinate five-day-old bees were collected for transcriptomic analysis as described  
714 above.

### 715 **Tissue dissections and RNA extraction**

716 We chose eight bees from each experimental group (except for the Control group from which we  
717 collected 15, see above) for the transcriptomic analysis. We first separated the head of the bee from the  
718 rest of the body and then opened small windows in the frontal part of the head capsule. The opened heads  
719 were lyophilized for 60 min to facilitate the dissection of the brain. After freeze-drying, we accomplished  
720 the removal of the frontal head cuticle, cleaned glandular remains, and removed the whole brain from the  
721 head capsule. The brain was cleaned of any other tissue and placed it in a fresh centrifuge tube. All  
722 dissections processing was carried out on dry ice to minimize RNA degradation. RNA was extracted  
723 using the RNeasy kit Invisorb Spin Tissue RNA Mini Kit (Invitex, Germany) according to the  
724 manufacturer's protocol. RNA samples were shipped on dry ice to the Carver Biotechnology Center at the  
725 University of Illinois (UIUC) for RNA sequencing. Bee bodies were sent on dry ice to the lab of Dr.  
726 Robinson at the Carl R. Woese Institute for Genomic Biology, UIUC, where the fat body RNA was  
727 extracted. The bee abdomen was separated and immersed in chilled RNA-later ICE (Thermo-Fisher, MA,  
728 USA), for 16-18 hours. The gut, ovaries and other internal organs were removed leaving the fat body  
729 tissue attached to the abdominal cuticle. The fat body was placed in a fresh centrifuge tube. RNA was  
730 extracted using the RNeasy kit, Qiagen, (OR, USA), followed by DNase treatment. For both the brain and  
731 fat body tissues, 1µg of RNA from each sample was used for whole transcriptome expression analysis.  
732 The RNA integrity was determined using a Bioanalyzer 2100 (Agilent).

733 For sequencing, all libraries were diluted to a 6nM concentration. RNA-Seq libraries were  
734 constructed with the TruSeq Stranded mRNA HT (high throughput kit, Illumina cat #: RS-122-2103)  
735 using an epMotion 5075 robot (Eppendorf). The libraries were pooled in equimolar concentration as per  
736 instructions and each pool was quantitated by qPCR. Paired-end for brain and single-end for fat body  
737 sequencing (read length = 100nt) was performed on an Illumina HiSeq 2500 using a TruSeq SBS  
738 sequencing kit, v4. FASTQ files were generated with CASAVA 1.8.2. Pooled RNA-seq samples  
739 produced an average of 34,013,322 reads per sample for brain tissue and 23,257,243 reads per sample for  
740 fat body tissue. RNA-seq files have been deposited in the Sequence Read Archive under BioProject  
741 number PRJNA497863.

### 742 **Bioinformatics analysis**

743 Sequencing reads were trimmed with Trimmomatic version 0.30 and aligned to the *B. terrestris*  
744 *1.0* reference genome (Elsik, et al. 2014; Sadd, et al. 2015)(Elsik et al., 2014; Sadd et al., 2015) using



745 STAR version 2.4.0 with alignIntronMax option set to 10000. Numbers of reads per gene were counted  
746 using featureCounts version 1.4.3 with default settings. EdgeR (Robinson, et al. 2010) was used to  
747 normalize using the trimmed mean of M-values (TMM) method. A total of 9,446 and 8,984 genes in the  
748 brain and fat body respectively and were tested for differential expression. We used the limma-voom  
749 method to calculate a one-way ANOVA followed by pairwise comparison between the groups in R  
750 version 3.2.0. P-value correction for multiple testing was done using the false discovery rates (FDR)  
751 method (Benjamini and Hochberg 1995). Lists of differentially expressed genes (DEGs) were determined  
752 based on  $FDR < 0.05$ .

753 We next performed Weighted Correlation Co-expression Network Analysis (WGCNA) using the  
754 R package *WGCNA* (Langfelder and Horvath, 2008) to identify groups (“modules”) of co-expressed  
755 genes. The appropriate soft-thresholding power to achieve a scale-free topology was estimated separately  
756 for each tissue; fat body plateaued at power = 7 while brain plateaued at power = 12. Genes were assigned  
757 to modules using the *blockwiseModules* function with default parameters except for power = 7 or 12,  
758 *maxBlockSize* = 25000, *networkType* = "signed hybrid" and *minModuleSize* = 20. Using these  
759 parameters, we identified 35 and 47 modules (ordered by the number of genes in each module:  $M1 > M2$ )  
760 in the fat body and brain respectively. The expression pattern of each module was summarized by  
761 calculating an eigengene value for each sample, which were then tested for differential expression in a  
762 similar fashion to individual genes: a limma model was used to calculate a one-way ANOVA test  
763 followed by pairwise comparisons. FDR correction was applied to each set of 35 or 47 modules

764 For Gene Ontology (GO) a reciprocal BLAST was used to create a one to one orthologous gene  
765 list from *Bombus terrestris* to *Drosophila melanogaster*. This list included 5214 fly genes ids (Supp Table  
766 2 and 3) and these were used as background lists for the GO and KEGG pathway enrichment analysis. We  
767 further looked separately on pathways enriched in DEGs that are up- or down-regulated. The GO and  
768 KEGG pathway enrichment was done in DAVID 6.8 (Huang, et al. 2009). For the analysis, we used the  
769 standard parameters and the GO.FAT option. The enrichment was calculated based on the frequency of  
770 significantly differentially expressed genes (after FDR correction) in a pathway compared to the expected  
771 frequency based on the background gene list used in the analysis. The significant of the enrichment was  
772 calculated using Fisher exact test followed by Benjamini fold discovery rate correction in DAVID.

773 For KEGG pathway enrichment and figures, pathway information for *Bombus terrestris* was  
774 downloaded as a single *keg* file from the KEGG website. A list of genes for each pathway was derived  
775 from this *keg* file. DEGs were matched to each pathway and enrichment analysis was performed in R.  
776 Enrichment was calculated based on the frequency of significantly differentially expressed genes in a

777 pathway compared to the expected frequency based on the total gene set used in gene expression analysis.  
778 The hypergeometric test was calculated using the hyperfunction from the ‘stats’ package in R.

779 The KEGG pathway Ribosome (ko#: 3010) includes genes from the cytoplasmic and the  
780 mitochondrial ribosomes (mitoribosome) together, for the analysis, we split between the two ribosomes  
781 based on the NCBI annotation of the genes. Many of the *B. terrestris* mitoribosome genes are not  
782 included in the KEGG dataset. However, in the NCBI dataset, 33 additional mitoribosome genes are  
783 annotated, making this pathway more reliable as the mitoribosome includes 80 genes in most eukaryotes  
784 (Greber and Ban 2016). For the analysis of this pathway, we used both the KEGG and the NCBI  
785 annotated genes and included all the genes in the figures.

786 For the analysis of the dominance\ subordinate gene expression trend, we used the raw p-value  
787 for our analysis as none of the genes were statistically significant after FDR correction. We split the  
788 trending genes list to up and down-regulated in dominant bees compare to subordinate bees and checked  
789 for GO and KEGG enrichment using DAVID as explained above.

#### 790 **Vitellogenins analysis**

791 Salmela, et al. (2016) identified four honey bee *Vitellogenins* proteins (*amVg*, *amVg like-A*, *amVg*  
792 *like-B*, and *amVg like-C*). Using BLAST we identified four *B. terrestris* orthologs, each located on a  
793 different linkage group. All four predicted *Vg*-like proteins contain a *Vitellogenin* domain, or at least part  
794 of it (Supp Fig 2A). The *B. terrestris* LOC100650436 is predicted as the ortholog of *Vg* protein and most  
795 similar to the protein that accumulates in the developing eggs of honey bees and other insects and  
796 functions as the egg yolk precursor (Tufail and Takeda 2008; Salmela, et al. 2016). The other three honey  
797 bee *Vg* paralogs were also identified in the *B. terrestris* genome: LOC100643258 gene similar to *amVg*  
798 *like-A*, LOC100644917 similar to *amVg like-B*, and LOC100649251 similar to *amVg like-C*, and were  
799 designated btVg-like-A, btVg-like-B, and btVg-like-C, respectively

#### 800 **Comparison to published data**

801 We compared our data with published data sets from bumble bees and honey bees. Gene expression data  
802 sets were obtained from the supplementary tables of the following studies: Transcriptional profiling  
803 (RNAseq) of *B. terrestris* queens fat body at various life stages from (Amsalem, et al. 2015); whole-brain  
804 transcriptional profiling (microarray) of methoprene treatment of honey bee workers from (Whitfield, et  
805 al. 2006). Overlap of statistically significant differentially expressed genes from each study was tabulated  
806 and hypergeometric tests were performed to test whether the overlap of the two datasets is statistically  
807 different from expected by chance.

808 **Supplementary table and figures**

809 **Supp Table 1. JH replacement therapy rescued the expression level of hundreds of genes in the**  
810 **brain and fat body.** Person correlation test results for shared genes differently expressed between the  
811 CA- group and the other three experimental groups: Fat body (**A**) Brain (**B**). The number are R<sup>2</sup> and \*\*\*  
812 represent p << 0.0001.

| <b>A. Fat body (1512 genes)</b> | <b>Sham vs CA-</b> | <b>CA-+JH vs CA-</b> |
|---------------------------------|--------------------|----------------------|
| <b>Control vs CA-</b>           | 0.783 ***          | 0.522 ***            |
| <b>Sham vs CA-</b>              | -                  | 0.662 ***            |

813

| <b>B. Brain (700 genes)</b> | <b>Sham vs CA</b> | <b>CA-+JH vs CA-</b> |
|-----------------------------|-------------------|----------------------|
| <b>Control vs CA-</b>       | 0.882 ***         | 0.808 ***            |
| <b>Sham vs CA-</b>          | -                 | 0.846 ***            |

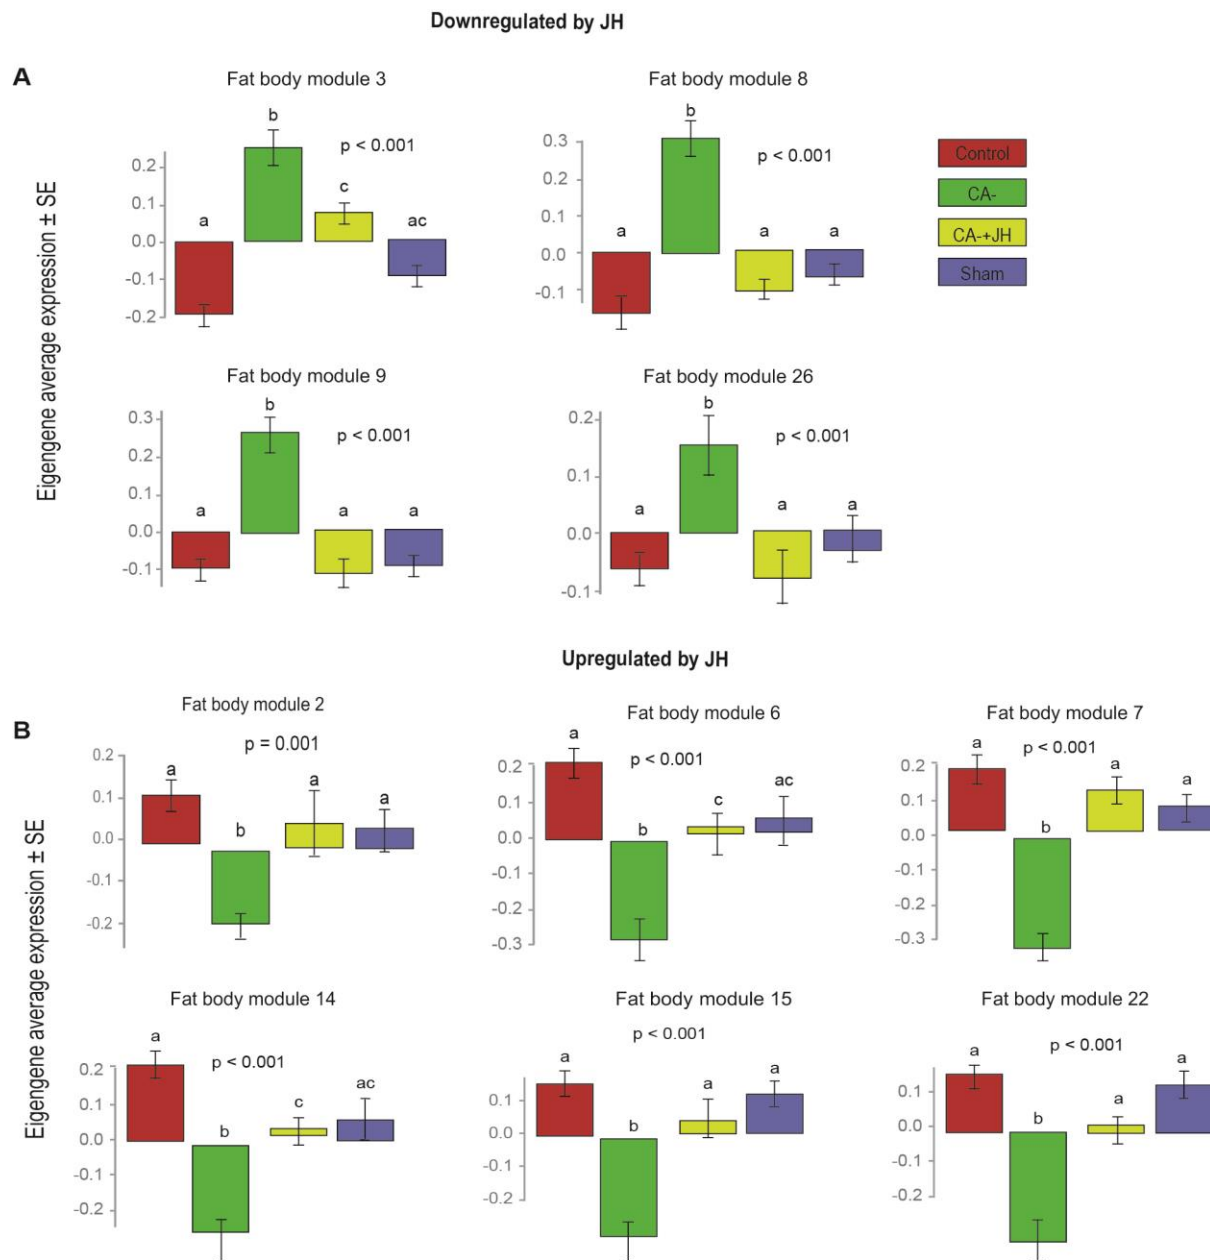

814

815 **Supp. Fig. 1: WGCNA analysis of gene expression in the fat body.** The bar represents the module  
 816 eigengene (the best summary of the standardized module expression data) average expression  $\pm$  SE, for  
 817 each experimental treatment, control (red), allatectomized (CA-, green), Replacement therapy (CA+JH,  
 818 yellow), Sham-operated (blue). **A.** Downregulated by JH: module 3 (886 genes) module 8 (249 genes),  
 819 module 9 (244 genes), module 26 (71 genes). **B.** Upregulated by JH: module 2 (1310 genes), module 6  
 820 (268 genes), module 7 (267 genes), module 14 (145 genes), module 15 (129 genes) module 22 (85 genes).  
 821 The p-values were obtained from ANOVAs, different letters above bars represent significant differences  
 822 between the experimental groups in a Limma pairwise comparison. For a summary of all modules see  
 823 Supp. Table 4a.

824

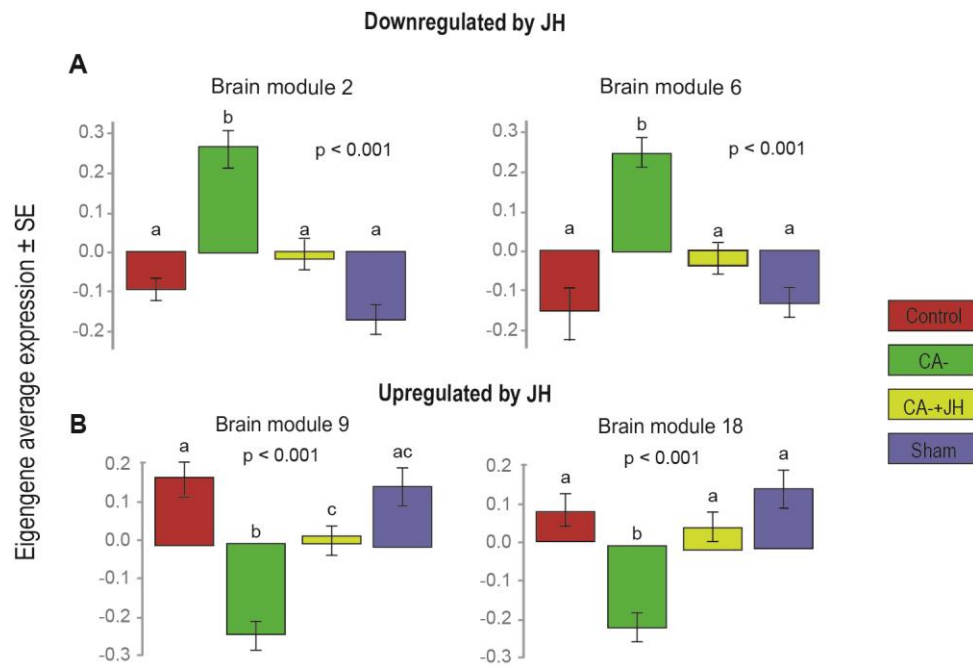

825

826 **Supp Fig. 2: WGCNA analysis of gene expression in the brain.** Details as in Supp fig 1. **A.**

827 Downregulated by JH: module 2 (347 genes) module 6 (264 genes). **B.** Upregulated by JH: module 9

828 (196), module 18 (70). For a summary of all modules see Supp. Table 4b.

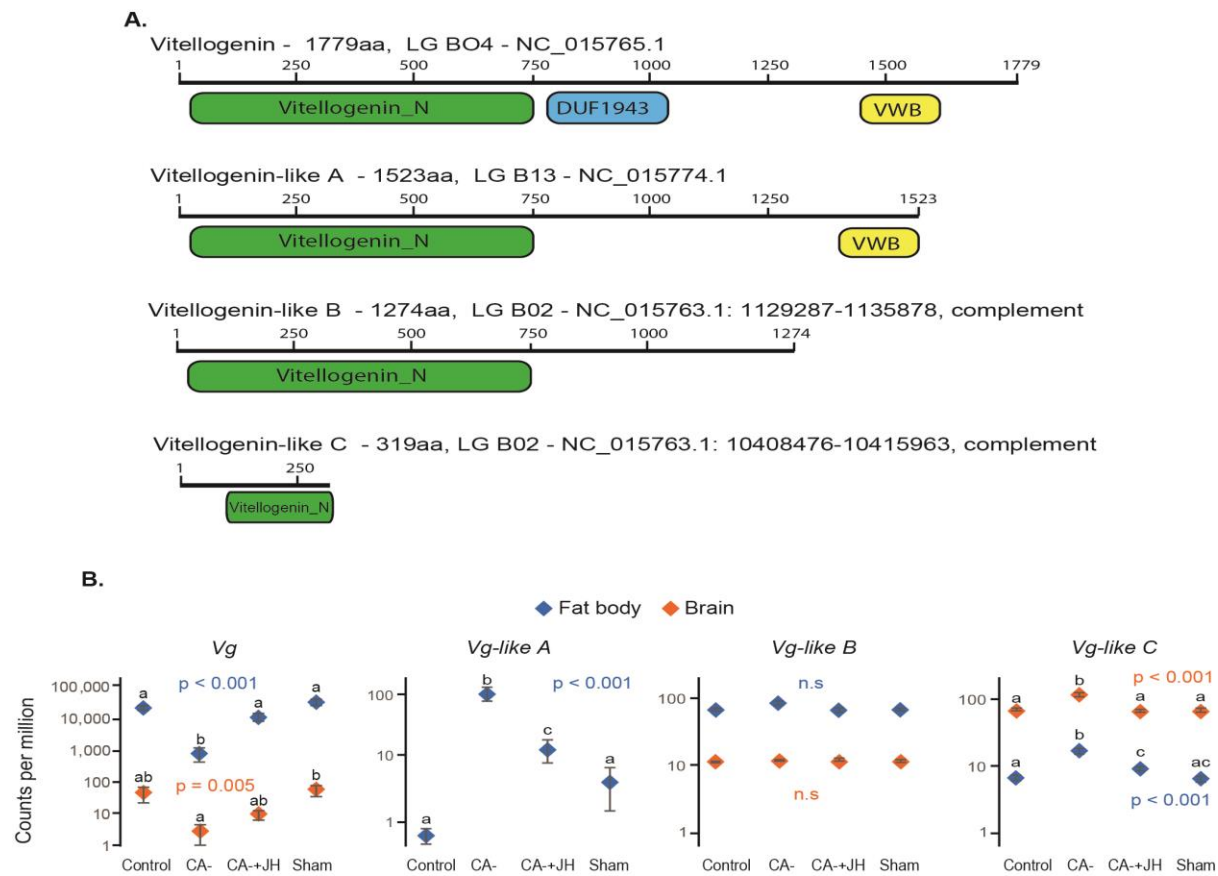

829

830 **Supp Fig. 3: The influence of JH on the expression of Vitellogenins.** (A) Gene models of the *Bombus*  
 831 *terrestris* four *Vg-like* proteins. (B) Transcript abundance for the four bumble bee *Vg-like* genes. Orange  
 832 diamonds - brain; blue diamonds - fat body. The *p*-values summarise ANOVA (with FDR correction).  
 833 Treatments marked with different lowercase letters are significantly different in Limma pairwise analyses  
 834 (FDR  $p < 0.05$ )
